# 1 **The interferon-inducible GTPase MxB promotes capsid disassembly** 2 **and genome release of herpesviruses**

3

4 Manutea C. Serrero<sup>1,2</sup>, Virginie Girault<sup>3</sup>, Sebastian Weigang<sup>4</sup>, Todd M. Greco<sup>5</sup>,

5 Ana Ramos-Nascimento<sup>1</sup>, Fenja Anderson<sup>1</sup>, Antonio Piras<sup>3</sup>, Ana Hickford Martinez<sup>1</sup>,

6 Jonny Hertzog<sup>6</sup>, Anne Binz<sup>1,2,7</sup>, Anja Pohlmann<sup>1,2,7</sup>, Ute Prank<sup>1</sup>, Jan Rehwinkel<sup>6</sup>,

7 Rudolf Bauerfeind<sup>8</sup>, Ileana M. Cristea<sup>5</sup>, Andreas Pichlmair<sup>3,9</sup>, Georg Kochs<sup>4</sup>, and

8 Beate Sodeik<sup>1,2,7</sup>

9

10 <sup>1</sup> Institute of Virology, Hannover Medical School, Hannover, Germany

11 <sup>2</sup> RESIST - Cluster of Excellence, Hannover Medical School, Hannover, Germany

12 <sup>3</sup> Institute of Virology, Technical University Munich, Munich, Germany

13 <sup>4</sup> Institute of Virology, Freiburg University Medical Center, University of Freiburg, Freiburg, Germany

14 <sup>5</sup> Department of Molecular Biology, Princeton University, Princeton, USA

15 <sup>6</sup> MRC Human Immunology Unit, MRC Weatherall Institute of Molecular Medicine, Radcliffe

16 Department of Medicine, University of Oxford, Oxford, UK

17 <sup>7</sup> German Center for Infection Research (DZIF), Hannover-Braunschweig Partner Site, Germany

18 <sup>8</sup> Research Core Unit Laser Microscopy, Hannover Medical School, Hannover, Germany

19 <sup>9</sup> German Center for Infection Research (DZIF), Munich Partner site, Germany

20

21

22

23 Corresponding author:

24 Beate Sodeik

25 Institute of Virology, OE 5230

26 Hannover Medical School

27 Carl-Neuberg-Str. 1, D-30623 Hannover, Germany

28 Phone: ++49 - 511 - 532 2846

29 FAX: ++49 - 511 - 532 8736

30 Email: [sodeik.beate@mh-hannover.de](mailto:sodeik.beate@mh-hannover.de)

31

32 Number of pages: 47

33 Number of figures: 8 figures, 8 supplementary figures, 4 supplementary tables

34 **ABSTRACT**

35 Host proteins sense viral products and induce defence mechanisms, particularly in immune cells.  
36 Using cell-free assays and quantitative mass spectrometry, we determined the interactome of capsid-  
37 host protein complexes of herpes simplex virus and identified the large dynamin-like GTPase  
38 myxovirus resistance protein B (MxB) as an interferon-inducible protein interacting with capsids.  
39 Electron microscopy analyses showed that cytosols containing MxB had the remarkable capability to  
40 disassemble the icosahedral capsids of herpes simplex viruses and varicella zoster virus into flat  
41 sheets of connected triangular faces. In contrast, capsids remained intact in cytosols with MxB  
42 mutants unable to hydrolyse GTP or to dimerize. Our data suggest that MxB senses herpesviral  
43 capsids, mediates their disassembly, and thereby restricts the efficiency of nuclear targeting of  
44 incoming capsids and/or the assembly of progeny capsids. The resulting premature release of viral  
45 genomes from capsids may enhance the activation of DNA sensors, and thereby amplify the innate  
46 immune responses.

## 47 INTRODUCTION

48 Infections with human alphaherpesviruses are associated with painful and stigmatizing  
49 manifestations such as herpes labialis or herpes genitalis, but also cause life-threatening meningitis  
50 or encephalitis, potentially blinding eye infections, herpes zoster, and post-herpetic neuralgia,  
51 particularly in immunocompromised patients (Gershon *et al.*, 2015; Whitley & Roizman, 2016;  
52 Whitley & Johnston, 2021). Herpes simplex viruses (HSV-1, HSV-2) and varicella zoster virus (VZV)  
53 productively infect epithelial and fibroblast cells of the skin and mucous membranes as well as  
54 neurons, but are restricted in immune cells. Macrophages, Langerhans cells, dendritic cells, and NK  
55 cells mount potent immune responses against alphaherpesviruses (Whitley & Roizman, 2016).

56 Intracellular DNA sensors are crucial to sense herpesvirus infections, and to induce caspase-1  
57 mediated inflammation and type I IFN expression (Hertzog & Rehwinkel, 2020; Kurt-Jones *et al.*,  
58 2017; Lum & Cristea, 2021, Ma *et al.*, 2018; Paludan *et al.*, 2019; Stempel *et al.*, 2019). During an  
59 unperturbed infection, capsid shells shield herpesviral genomes from cytosolic sensors during nuclear  
60 targeting as well as after nuclear genome packaging (Arvin & Abendroth, 2021; Döhner *et al.*, 2021;  
61 Knipe *et al.*, 2021). HSV-1 capsids can withstand compressive forces of up to 6 nN which is more than  
62 sufficient to endure the 18 atm repulsive pressure of the packaged viral DNA (Bauer *et al.*, 2013;  
63 Roos *et al.*, 2009). So far, it is unclear how cytosolic DNA sensors gain access to herpesviral genomes;  
64 either cytosolic host factors disassemble the sturdy herpesviral capsids during infection, or the  
65 nuclear envelopes become leaky.

66 HSV-1 virions contain an amorphous tegument layer that links the icosahedral capsids with a  
67 diameter of 125 nm to the viral envelope proteins (Crump, 2018; Dai & Zhou, 2018; Diefenbach,  
68 2015). To identify cytosolic proteins that promote or restrict infection by interacting with HSV-1  
69 capsids, we have developed cell-free methods to reconstitute capsid-host protein complexes using  
70 tegumented capsids from extracellular viral particles or tegument-free capsids from the nuclei of  
71 infected cells (Radtko *et al.*, 2014). Intact capsids are incubated with cytosol prepared from tissues or  
72 cultured cells, and the capsid-host protein complexes are isolated, and characterized by mass  
73 spectrometry (MS), immunoblot, electron microscopy, and functional assays. We could show that

74 HSV-1 capsids require inner tegument proteins to recruit microtubule motors, to move along  
75 microtubules, to dock at nuclear pore complexes (NPCs), to release viral genomes from capsids, and  
76 to import viral genomes into the nucleoplasm, and that capsids lacking tegument cannot move along  
77 microtubules, but still bind to nuclear pores (Anderson *et al.*, 2014; Ojala *et al.*, 2000; Radtke *et al.*,  
78 2010; Wolfstein *et al.*, 2006).

79 Here, we searched for proteins that might contribute to sensing cytosolic capsids and thereby  
80 promote the detection of herpesviral genomes. Using extracts of matured THP-1 cells, a model  
81 system for human macrophages (Tsuchiya *et al.*, 1980), we identified type I interferon (IFN) inducible  
82 proteins that bound specifically to HSV-1 capsids. Among them was the large dynamin-like GTPase  
83 myxovirus resistance protein B (MxB). MxB limits the infection of several herpesviruses, and can  
84 mediate almost 50% of the IFN-mediated restriction of HSV-1, although its mode of action has  
85 remained elusive so far (Cramer *et al.*, 2018; Liu *et al.*, 2012; Schilling *et al.*, 2018; Vasudevan *et al.*,  
86 2018). MxB has been first described for its potent inhibition of HIV infection (Goujon *et al.*, 2013;  
87 Kane *et al.*, 2013; Liu *et al.*, 2013). The human *MX2* gene codes for a full-length MxB (residues 1-715)  
88 and a smaller version (residues 26-715) that lacks an N-terminal extension (NTE), which both are  
89 highly expressed upon IFN induction (Melen *et al.*, 1996). MxB likely operates as an anti-parallel  
90 dimer but can also form higher-order filaments; its N-terminal GTPase domain connects to a bundle  
91 signalling element that moves relative to the GTPase domain in response to nucleotide binding, and  
92 the C-terminal stalk domain is critical for MxB oligomerization (Alvarez *et al.*, 2017; Chen *et al.*, 2017;  
93 Fribourgh *et al.*, 2014; Gao *et al.*, 2011).

94 We show here that both, full-length MxB(1-715) and MxB(26-715) have the remarkable property  
95 to disassemble the capsids of the three human alphaherpesviruses HSV-1, HSV-2, and VZV, so that  
96 they can no longer transport nor shield the viral genomes. Capsid disassembly did not require  
97 proteases but depended on the ability of MxB to hydrolyse GTP and to dimerize. As the large  
98 tegument protein pUL36 links the capsid vertices to the other tegument proteins (Crump, 2018; Dai  
99 & Zhou, 2018; Diefenbach, 2015), and as an increasing amount of associated tegument proteins  
100 protected capsids against MxB mediated disassembly, we propose that MxB attacks the capsids at

101 their vertices. Our data suggest that MxB can bind to and disassemble incoming as well as progeny  
102 capsids, and thereby might increase the sensing of cytosolic and nuclear viral genomes. Therefore,  
103 the MxB GTPase might be the sought-after capsid destroyer that acts upstream of cytosolic or  
104 nuclear sensors to promote viral genome detection and induction of innate immune responses.

## 105 **RESULTS**

106 **IFN induction prevents HSV-1 infection of macrophages.** Before investigating capsid interactions  
107 with macrophage proteins, we compared HSV-1 infection in human keratinocytes (HaCat), pigment  
108 epithelial cells (RPE), and THP-1 cells at low, moderate or high multiplicity of infection (MOI). We  
109 stimulated monocyte THP-1 cells with phorbol 12-myristate 13-acetate to differentiate them into a  
110 macrophage-like phenotype, and used them either directly ( $M\phi$ ) or after a resting period of 3 days  
111 ( $M\phi_R$ ). HSV-1 replicated productively in HaCat and RPE cells up to 20 hpi, while a pre-treatment with  
112 IFN delayed and reduced but did not prevent the production of infectious virions (Fig. 1). Both  $M\phi$   
113 and  $M\phi_R$  released 10 to 100-fold less infectious HSV-1, and an IFN pre-treatment prevented infection  
114 at all MOIs. Thus,  $M\phi$  and  $M\phi_R$  restricted HSV-1 infection efficiently, and the induction of IFN-  
115 stimulated genes (ISGs) prevented any productive infection.

116 **IFN-induced protein changes in the cytosol of macrophages.** To identify cytosolic macrophage  
117 proteins that might foster or restrict HSV-1 capsid functions, we prepared extracts from  $M\phi_R$  or IFN-  
118 induced  $M\phi_{IFN}$  to reconstitute capsid-host protein complexes as they might assemble in macrophages  
119 (Fig. S1). Using subcellular fractionation and subsequent dialysis (Fig. S2A), we depleted the extracts  
120 of nuclei and mitochondria (Fig. S2B; pellet P1), cytoplasmic membranes such as Golgi apparatus,  
121 endoplasmic reticulum and plasma membrane (P1, P2), and small metabolites (S2, S3, S4).  
122 Furthermore, most of the cytoskeletal tubulin and actin sedimented into the first pellet (P1), while  
123 glyceraldehyde 3-phosphate dehydrogenase (GAPDH), a bona-fide cytosolic protein, remained  
124 soluble in the supernatants (S1, S2, S2', S3, S4). Next, we analysed the proteomes of the  $M\phi_R$  and  
125 IFN-induced  $M\phi_{IFN}$  cytosols at low ATP/GTP concentration [ATP/GTP<sup>low</sup>] by mass spectrometry (MS;  
126 Table S1). We detected 494 (Fig. S2C; black circles) of more than 600 reported IFN-inducible proteins

127 (Rusinova *et al.*, 2013). Of those, GALM, COL1A1, LGALS3BP, NT5C3A, IFI44, IFIT2, IFIT3, GBP4, SRP9,  
128 IFIT5, DSP, and L3HYPDH were enriched by at least 2-fold in the  $M\phi_{IFN}$  cytosol (Fig. S2C; red). These  
129 changes might reflect IFN-induced transcriptional or translational regulation, post-translational  
130 modification, subcellular localization, or susceptibility to proteolysis, and show that the IFN induction  
131 had changed the cytosol proteome of the  $M\phi_{IFN}$ .

132 **HSV-1 capsids interact with specific cytosolic macrophage proteins.** To search for cytosolic  $M\phi$   
133 proteins whose interactions with HSV-1 capsids depend on their surface composition, we generated  
134 tegumented viral  $V_{0.1}$ ,  $V_{0.5}$ , and  $V_1$  capsids as well as D capsids with a reduced tegumentation (Fig.  
135 S1). For this, we lysed extracellular particles released from HSV-1 infected cells with non-ionic  
136 detergent to solubilize the envelope proteins and lipids, and in the presence of 0.1, 0.5, or 1 M KCl to  
137 modify intra-tegument protein-protein interactions (Anderson *et al.*, 2014; Ojala *et al.*, 2000; Radtke  
138 *et al.*, 2010; Radtke *et al.*, 2014; Wolfstein *et al.*, 2006; Zhang & McKnight, 1993). Furthermore, we  
139 dissociated tegument from  $V_{0.1}$  capsids by a limited trypsin digestion to generate so-called D capsids.  
140 We then incubated similar amounts of different capsid types as calibrated by immunoblot for the  
141 major capsid protein VP5 (Fig. S2D) with cytosol at ATP/GTP<sup>low</sup> from  $M\phi_R$  or IFN-induced  $M\phi_{IFN}$  for 1  
142 h at 37°C. The capsid-host protein complexes assembled *in vitro* were harvested by sedimentation,  
143 and their interactomes were determined by quantitative MS (c.f. Fig. S1). As before (Radtke *et al.*,  
144 2010; Snijder *et al.*, 2017), the protein intensities were normalized across samples to the abundance  
145 of the major capsid protein VP5 (Table S2, host; Table S3, viral).

146 Of 2983 proteins identified (Table S2), we detected 1816 in at least 3 of the 4 replicates in any of  
147 the 8 different capsid-host protein complexes. Of those, 598 host proteins bound differentially to one  
148 capsid type over another (Table S2; fold change  $\geq 2.8$ ; permutation-based FDR  $\leq 0.05$ ). The HSV-1  
149 capsids had recruited specifically 279 proteins of  $M\phi_R$  and 390 of  $M\phi_{IFN}$  cytosol of which 71 were  
150 shared. Hierarchical clustering analyses of the associated  $M\phi_R$  or  $M\phi_{IFN}$  proteins identified 4 major  
151 classes; e.g. one enriched on V over D capsids (Fig. S3A and S3B, top green) and one enriched on  
152 D over V capsids (Fig. S3A and S3B, bottom violet). Therefore, we compared the capsid-host  
153 interactions of D capsids directly to  $V_{0.1}$  (Fig. 2A, 2D),  $V_{0.5}$  (Fig. 2B, 2E), or  $V_1$  (Fig. 2C, 2F) capsids, and

154 identified 82 proteins of  $M\phi_R$  (Fig. 2A, 2B, 2C) and 141 of  $M\phi_{IFN}$  (Fig. 2D, 2E, 2F) with 35 being shared  
155 (Table S2; difference  $\geq 2.83$ -fold; FDR  $\leq 0.01$ ). The  $M\phi_R$  capsid-host complexes included 12 and the  
156 ones of  $M\phi_{IFN}$  19 proteins listed in the interferome database (Rusinova *et al.*, 2013; red in Fig. 2).  
157 Gene ontology and pathway enrichment analyses showed that the identified 82  $M\phi_R$  (Fig S4) and 141  
158  $M\phi_{IFN}$  (Fig. 3) proteins included many players of innate immunity, intracellular transport, nucleotide  
159 and protein metabolism, as well as intracellular signalling. Overall, the host proteomes of  $V_{0.1}$  (red)  
160 and D (grey) capsids were rather distinct, but more similar for  $V_{0.5}$  (blue) and  $V_1$  (green) capsids  
161 (Fig. S4 and Fig. 3). For example,  $V_{0.1}$  capsids had recruited specifically the innate immunity proteins  
162 PIGR, IGHA1, BPIFA1 and DEFA3, but D capsids LRRFIP1, UFC, C3 and DCD from  $M\phi_R$  cytosol. In  $M\phi_{IFN}$ ,  
163 the D capsids were enriched for C3, C6, IGBP1, UBA5, UBXN1, UBE3A, and RNF123. These data  
164 suggest that protein domains displayed on different capsids interacted with specific cytosolic  $M\phi_R$  or  
165  $M\phi_{IFN}$  proteins.

166 In these assays, the capsids interacted with several proteins already validated to promote or  
167 restrict HSV or VZV infection. Examples are the ESCRT-III co-factor VPS4 (Cabrera *et al.*, 2019; Crump  
168 *et al.*, 2007), EIF4H (Page & Read, 2010), the Kif2a subunit of kinesin-13 (Turan *et al.*, 2019), the  
169 POLR1C subunit of RNA polymerase III (Carter-Timofto *et al.*, 2018), the DNA protein kinase PRKDC  
170 (Justice *et al.*, 2021), and DDX1 (Zhang *et al.*, 2011). Moreover, the deubiquitinase USP7 (Rodriguez  
171 *et al.*, 2020) and the ubiquitin ligases RNF123, TRIM72, UFC1 and UBE3A as well as the proteasome  
172 might regulate capsid functionality (Huffmaster *et al.*, 2015; Schneider *et al.*, 2021) or their  
173 degradation (Horan *et al.*, 2013; Sun *et al.*, 2019). These data show that HSV-1 capsids exposing a  
174 different tegument composition recruited specific cytosolic proteins from resting or IFN-induced  
175 macrophages.

176 **HSV-1 capsids recruit specific proteins responding to or regulating type I IFN.** We next analysed  
177 the  $M\phi_{IFN}$  samples in detail as IFN induction had prevented HSV-1 infection completely. We  
178 generated cluster maps for the 32 capsid-associated proteins belonging to the GO clusters *Response*  
179 *to type I IFN* or *Regulation of type I IFN production* (Table S2). V capsids recruited DHX9, HSPD1 and  
180 FLOT1 as well as proteins involved in the DNA damage response like PRKDC/DNA-PK, XRCC5, and

181 XCCR6 from both,  $M\phi_R$  and  $M\phi_{IFN}$  cytosol (Fig. 4). Interestingly, V capsids bound specifically to STAT1  
182 in  $M\phi_R$ , but to ADAR and IFIT2 in  $M\phi_{IFN}$  cytosol. D capsids were enriched for IFI16, OAS2, POLR1C,  
183 STAT2, and MxB in  $M\phi_{IFN}$  but not in  $M\phi_R$  (Fig. 4, Fig. S5). Particularly, the discovery of MxB in these  
184 capsid-host protein complexes was interesting, as MxB but not its homolog MxA restricts infections  
185 of the herpesviruses HSV-1, HSV-2, MCMV, KSHV, and MHV-68, but its mode of action has not been  
186 elucidated (Crameri *et al.*, 2018; Liu *et al.*, 2012; Schilling *et al.*, 2018; Vasudevan *et al.*, 2018).  
187 Therefore, we investigated the interaction of human MxB with HSV-1 capsids further.

188 **MxB binds to capsids.** We first characterized the MxB fractionation behaviour during the cytosol  
189 preparation (Fig. S2). As reported (Goujon *et al.*, 2013; Melen *et al.*, 1996), MxB was upregulated in  
190 IFN-induced  $M\phi_{IFN}$ . MxB sedimented with nuclei and mitochondria as expected (Cao *et al.*, 2020),  
191 with cytoplasmic membranes, and possibly filamentous MxB (Alvarez *et al.*, 2017) might have been  
192 sedimented too. Both, after the addition of ATP and GTP (ATP/GTP<sup>high</sup>) or the hydrolase apyrase (Pilla  
193 *et al.*, 1996; ATP/GTP<sup>low</sup>), a significant fraction of MxB remained soluble in the cytosol.

194 Next, we confirmed by immunoblotting that MxB co-sedimented with HSV-1 capsids which had  
195 been incubated in cytosols from  $M\phi_R$  or  $M\phi_{IFN}$ . In line with the MS results, MxB bound better to D  
196 than to  $V_{0.1}$ ,  $V_{0.5}$ , or  $V_1$  capsids (Fig. 5A). We next probed authentic nuclear capsids, namely empty A,  
197 scaffold-filled B, or DNA-filled C capsids, as well as tegumented  $V_1$ ,  $V_{0.5}$ ,  $V_{0.1}$  or D capsids with cytosol  
198 of A549-MxB(1-715) epithelial cells expressing MxB(1-715). Nuclear A and C as well as  $V_1$  and D  
199 capsids recruited MxB efficiently, while B,  $V_{0.1}$  and  $V_{0.5}$  capsids bound less MxB (Fig. 5B). MxB did not  
200 sediment by itself, and also did not associate with agarose beads used as another sedimentation  
201 control (Fig. 5A, 5B). These data indicate that MxB binds to specific structural features on the capsid  
202 surface.

203 In cells, MxB mediated restriction of herpesvirus replication depends on its N-terminal 25 amino  
204 acid residues (NTE), its GTPase activity, and its capacity to form dimers (Crameri *et al.*, 2018; Schilling  
205 *et al.*, 2018; Vasudevan *et al.*, 2018). We incubated capsids with cytosols containing MxA, MxB(1-  
206 715), MxB(26-715) (Melen *et al.*, 1996; Melen & Julkunen, 1997), MxB(K131A) with reduced GTP  
207 binding, MxB(T151A) lacking the GTPase activity, or MxB(M574D) unable to dimerize (Alvarez *et al.*,



208 2017; Fribourgh *et al.*, 2014; King *et al.*, 2004; Schilling *et al.*, 2018). In contrast to MxA, MxB(1-175),  
209 MxB(26-715), and MxB(M574D) co-sedimented with capsids to a similar extent. Interestingly,  
210 MxB(K131A) did not bind to capsids, while MxB(T151A) bound even stronger (Fig. 5C). These data  
211 suggest that conformational changes associated with GTP binding or hydrolysis contribute to MxB  
212 interaction with HSV-1 capsids.

213 **MxB disassembles capsids of alphaherpesviruses.** Next, we tested whether MxB might affect  
214 HSV-1 capsid stability. While the previous capsid sedimentation assays were performed at  
215 ATP/GTP<sup>low</sup>, they suggested that the GTP/GDP state of MxB might modulate its interaction with  
216 capsids. To test this experimentally, we supplemented the cytosols with 1 mM GTP, 1 mM ATP, and  
217 7.5 mM creatine phosphate to maintain high ATP/GTP levels [ATP/GTP<sup>high</sup>]. We resuspended  
218 sedimented capsid-host protein complexes and applied them onto EM grids (Fig. S1), or we added  
219 isolated capsids directly onto EM grids and then placed them on a drop of cytosol to allow the  
220 formation of capsid-host protein complexes (Fig. 6A). This direct *on-grid assay* required 50 times  
221 fewer capsids than the *sedimentation-resuspension assay* and allowed for time-course analyses. For  
222 both, we negatively contrasted the samples with uranyl acetate and analysed them by electron  
223 microscopy.

224 When capsids were incubated with cytosol from A549 control cells not containing MxB, we saw  
225 mostly intact capsids with an appropriate diameter of about 125 nm, and an intact icosahedral  
226 morphology characterized by pentons at the vertices and hexons on the triangular capsid faces  
227 (Fig. 6B). The capsids contained genomic DNA as the uranyl acetate used for negative contrast  
228 staining had not or only partially entered the capsid lumen. But a treatment with cytosol from  
229 IFN-induced M $\phi$ <sub>IFN</sub> or A549-MxB(1-715) cells dramatically impaired the capsid shell. Based on  
230 different MxB induced morphological changes, we classified the capsid structures that we had  
231 identified by immunolabeling for capsid proteins (Fig. S6) into three categories. *Intact capsids*  
232 (Fig. 6B, Fig. S6A) have an icosahedral morphology and include empty A, scaffold-filled B, and DNA-  
233 filled C capsids. *Punched capsids* are characterized by indentations on one or more vertices and an  
234 impaired icosahedral shape (Fig. 6C, Fig. S6B). *Flat shells* have completely lost their icosahedral shape

235 (Fig. 6D, Fig. S6C). We estimated the number of capsomers on *flat shells* based on their area, and  
236 scored a structure with <100 capsomers as a half capsid and with  $\geq 100$  as one capsid (numbers in  
237 Fig. 6D). Cytosols containing MxB(1-715) also disassembled capsids of HSV-2 (not shown) or VZV (Fig.  
238 6E) to *punched capsids* and *flat shells*. As MxB induced capsid disassembly of HSV-1, HSV-2 and VZV,  
239 these experiments suggest that MxB restricts the infection of herpesviruses by targeting their  
240 capsids.

241 **MxB requires GTP hydrolysis and dimerization to attack herpesviral capsids.** Next, we further  
242 characterized the capsid disassembly activity of MxB by quantitative electron microscopy. Cytosol  
243 from IFN-induced  $M\phi_{IFN}$  disassembled more than 80% of the capsids within 1 h while resting  $M\phi_R$   
244 disassembled only about 40% (Fig. 7A). Cytosol derived from A549 control cells had a minor effect on  
245 capsids, while cytosol from A549-MxB(1-715) cells disassembled capsids almost as efficiently as  
246 cytosol from  $M\phi_{IFN}$ . Spiking cytosol from A549 control cells with an increasing percentage of A549-  
247 MxB(1-715) cytosol led to an increasing capsid disassembly with a majority of *punched capsids*, at  
248 50% or 66% MxB cytosol, while incubation in pure A549-MxB(1-715) cytosol lead to more than 95%  
249 disassembly to mostly *flat shells* within 1 h of incubation (Fig. 7B). We then asked whether MxB had  
250 activated other host proteins to mediate capsid disassembly, or whether it was directly responsible.  
251 We prepared cytosol from A549-MxB(1-715)-MxB(26-715) expressing both untagged MxB proteins,  
252 or from A549-MxB-FLAG expressing MxB(1-715)-FLAG and MxB(26-715)-FLAG. Both cytosols  
253 promoted capsid disassembly (MxB; MxB-FLAG in Fig. 7C), but an immunodepletion with anti-FLAG  
254 antibodies removed the FLAG-tagged MxB proteins (Fig. S7), and accordingly the disassembly activity  
255 from the A549-MxB-FLAG cytosol (MxB-FLAG FT), while the anti-FLAG did neither deplete untagged  
256 MxB proteins, nor affect the capsid disassembly activity of the A549-MxB(1-715)-MxB(26-715)  
257 cytosol (MxB FT).

258 We next tested at ATP/GTP<sup>high</sup> the effect of various MxB mutants on HSV-1 capsid stability. While  
259 full-length MxB(1-715) induced capsid disassembly, the MxB mutants impaired in GTPase activity  
260 (T151A), GTP binding (K131A), or dimerization (M574D) as well as cytosol with MxB at ATP/GTP<sup>low</sup> did  
261 not (Fig. 7D). In contrast, the smaller MxB(26-715) protein lacking the NTE retained about 50% of the

262 capsid disassembly activity. Furthermore, studying the stability of capsids pre-adsorbed *on-grid* in a  
263 time-course revealed a lag phase of about 30 min until broken capsids appeared with increasing rate  
264 (Fig. 7E). The percentage of *punched capsids* reached a plateau at 50 min, while the amount of *flat*  
265 *shells* continued to increase (Fig. 7E). Further experiments showed that MxB attacked D capsids more  
266 efficiently than tegumented  $V_{0.5}$  capsids, of which about 70% resisted the MxB attack (Fig. 7F). In  
267 contrast, the  $V_{0.1}$  capsids seemed to be spared from MxB attack, since no broken capsids appeared  
268 within an 1 h treatment. Since MxB restricts infection of several herpesviruses (Crameri *et al.*, 2018;  
269 Liu *et al.*, 2012; Schilling *et al.*, 2018; Vasudevan *et al.*, 2018), we compared the impact of MxB on  
270 D capsids from HSV-1(17<sup>+</sup>)Lox, HSV-1(KOS), HSV-2(333), or on nuclear C capsids from VZV(rOka).  
271 Capsids of these human alphaherpesviruses were all susceptible to MxB attack (Fig. 7G).

272 **MxB attack leads to the release of viral genomes from capsids.** Next, we determined how well  
273 the capsid shells protected the viral genomes against a DNA nuclease digestion. Capsids released  
274 three or two times more viral genomes in cytosols from MxB(1-715) or MxB-FLAG than from control  
275 or MxB(M574D) cells (Fig. 7H). Together, these data indicate that the MxB GTPase disassembles the  
276 capsid shells and induces a release of viral DNA of several herpesviruses. Our experiments suggest  
277 that GTP binding and hydrolysis as well as dimerization contribute to MxB-mediated disassembly of  
278 alphaherpesvirus capsids. Its slow start with a lag of about 30 min indicates that the capsid attack  
279 might require some nucleating or cooperative reaction to assemble active MxB oligomers or an  
280 MxB-containing complex onto capsids.

281 **Tegument proteins protect against MxB attack.** As complete tegumentation shielded  $V_{0.1}$  capsids  
282 against destruction, while MxB bound to surface features exposed on  $V_{0.5}$ , A, C and D capsids, we  
283 compared the proteomes of the  $V_{0.1}$ ,  $V_{0.5}$ ,  $V_1$ , and D capsids. We calibrated the relative abundances  
284 of the 58 HSV-1 proteins detected to the normalized amounts of the major capsid protein VP5. The  
285 tegument compositions of  $V_{0.1}$ ,  $V_{0.5}$ , and  $V_1$  capsids were similar to each other but different from D  
286 capsids (Fig. 8). The bona-fide capsid proteins VP21, VP24, VP22a, VP19c, and VP23 varied little  
287 among all capsid types. However, D capsids contain a bit less capsid surface proteins; namely VP26,

288 the capsid specific vertex components (CSVC) pUL17 and pUL25, and to some extent the portal pUL6,  
289 and less of the major tegument proteins VP22, VP13/14, VP16, VP11/12 as well as other tegument  
290 proteins with ICP0, pUL36 and pUL37 being most susceptible to the trypsin treatment. Overall, there  
291 were little differences in the relative tegument protein amounts among  $V_{0.5}$  and  $V_1$  capsids. In  
292 contrast,  $V_{0.1}$  capsids contained more tegument proteins, e.g. VP13/14, pUS3, pUL41, pUL16, pUS11  
293 and pUL40. All capsid preparations contained traces of membrane proteins and nuclear HSV-1  
294 proteins contributing to DNA replication and packaging (Fig. S8). These data further validated that a  
295 treatment with 0.5 or 1 M KCl during the detergent lysis of virions destabilized intra-tegument  
296 interactions. Furthermore, the limited trypsin digestion had reduced the capsid proteome further  
297 and increased the susceptibility to MxB attack.

## 298 DISCUSSION

299 Cell-type specific defence mechanisms shape the arms race between proteins restricting or  
300 promoting nuclear targeting of incoming viral capsids and viral genome release into the nucleoplasm.  
301 We have developed biochemical assays to investigate functional interactions of viral capsids with  
302 host cell structures (Radtke *et al.*, 2014), and analysed here HSV-1 capsid-host protein complexes  
303 assembled in cytosols from resting  $M\phi_R$  or IFN-induced  $M\phi_{IFN}$  cells. We show that the IFN-inducible  
304 MxB GTPase bound to alphaherpesviral capsids, most likely to structural features around the capsid  
305 vertices, and disassembled herpesvirus capsids in a GTP-dependent fashion, and so that they no  
306 longer shielded the viral genomes. Capsid disassembly by MxB could reduce nuclear targeting of  
307 incoming capsids and genomes, but stimulate the activation of cytosolic DNA sensors and innate  
308 immune responses.

309 **Cytosolic IFN-induced macrophage proteins binding to HSV-1 capsids.** IFN induction prevented  
310 HSV-1 infection of  $M\phi$ , and increased the cytosolic abundance of at least 12 proteins listed in the  
311 interferome database (Rusinova *et al.*, 2013). Here, we assembled host protein-capsid complexes  
312 from HSV-1 capsids and cytosols of  $M\phi$  or  $M\phi_{IFN}$  cells as they might also form in cells. While  $V_{0.5}$  and  
313  $V_1$  capsids recruited unique but also common proteins, the proteomes of  $V_{0.1}$  and D capsids were

314 more distinct. These results are consistent with immunoelectron microscopy data showing that the  
315 surface of distinct V capsid types display different tegument epitopes (Radtke *et al.*, 2010), and with  
316 cryoelectron tomography data revealing diminishing tegument densities from  $V_{0.1}$ ,  $V_{0.5}$ ,  $V_1$  capsids to  
317 C capsids (Anderson *et al.*, 2014). Accordingly, capsids with different tegument composition recruit  
318 distinct sets of cytosolic proteins from brain tissue (Radtke *et al.*, 2010), or macrophages as shown  
319 here. Host proteins may bind to viral proteins in both states, when they are soluble in the cytosol or  
320 the nucleoplasm, or when they are associated with capsids. From host proteins shown here to bind  
321 to capsids, direct interactions with tegument proteins have already been reported; e.g. USP7 binding  
322 to ICPO (Everett *et al.*, 1997) or EIF4H binding to vhs (pUL41; Page & Read, 2010). Furthermore  
323 proteins involved in intracellular trafficking or virus assembly associated particularly with  
324 tegumented V capsids. For example, importin  $\alpha 5$  (*KPNA1*) might mediate capsid targeting to the  
325 nuclear pores (Döhner *et al.*, 2018; Döhner *et al.*, 2021), while RAB1B contributes to the  
326 envelopment of cytosolic HSV-1 capsids (Zenner *et al.*, 2011).

327 **MxB binding to alphaherpesviral capsids.** In addition to MxB, the host-capsid complexes included  
328 other antiviral proteins which in turn might be counteracted by HSV-1 proteins. Several  $M\Phi_{IFN}$   
329 proteins already know to restrict herpesviruses, e.g. STAT2, POLR1C, IFI16, DDX58 (RIG-I), and OAS2  
330 (Kurt-Jones *et al.*, 2017; Lum & Cristea, 2021; Ma *et al.*, 2018), bound preferentially to D capsids. As it  
331 was not known how MxB might restrict herpesviral infection (Crameri *et al.*, 2018; Schilling *et al.*,  
332 2018; Vasudevan *et al.*, 2018), we investigated its association with capsids further. B capsids are less  
333 sturdy and have not undergone the structural changes that stabilize the A and C capsids (Roos *et al.*,  
334 2009; Sae-Ueng *et al.*, 2014; Snijder *et al.*, 2017). Intriguingly, this stabilization depends on the CSVC  
335 proteins pUL17 and pUL25 (Sae-Ueng *et al.*, 2014; Snijder *et al.*, 2017), which are present on B, A,  
336 and C capsids (Anderson *et al.*, 2014; Radtke *et al.*, 2010; Snijder *et al.*, 2017). As MxB bound to A, C  
337 and D, but not to B capsids, it might recognize surface features formed during capsid stabilization,  
338 e.g. matured CSVCs or portals, which are increasingly shielded on tegumented  $V_1$ ,  $V_{0.5}$ , and  $V_{0.1}$   
339 capsids.

340 MxA and MxB GTPases inhibit several viruses by blocking early steps of infection (Haller *et al.*,  
341 2015). MxB binding to HIV capsids depends on its N-terminal region (NTR) of about 90 residues and  
342 the GTPase domain (Betancor *et al.*, 2019; Fricke *et al.*, 2014; Smaga *et al.*, 2019; Xie *et al.*, 2021).  
343 Similarly, HSV-1 capsids bound MxB(1-715) and to a lesser extent MxB(26-715). But in contrast to HIV  
344 capsids (Betancor *et al.*, 2019; Xie *et al.*, 2021), HSV-1 capsids recruited also the GTPase deficient  
345 MxB(T151A) and the monomeric MxB(M574D). These data indicate that the interaction of MxB with  
346 HSV-1 capsids depends on the NTE of 25 residues, its GTP/GDP status, but not on its dimerization.

347 **MxB induced disassembly of alphaherpesviral capsids.** HSV-1 capsid disassembly did not require  
348 proteolysis as the cytosols contained protease inhibitors, but may be modulated by other host  
349 proteins as there was a considerable lag phase. MxB did not attack fully tegumented  $V_{0.1}$  capsids,  
350 while  $V_{0.5}$  or D capsids were more susceptible. The large tegument protein pUL36 links other  
351 tegument proteins to the capsids; it is tightly associated with pUL17 and pUL25 at the CSVCs at the  
352 pentons, and it extends towards the 2-fold symmetry axes connecting neighbouring capsid faces  
353 (Coller *et al.*, 2007; Huet *et al.* 2016; Liu *et al.*, 2019; Newcomb & Brown, 1991; Schipke *et al.*, 2012).  
354 Our electron microscopy data suggest that MxB attacked the 5-fold symmetry axes as the *punched*  
355 capsids had dramatic dents on the capsid vertices. MxB might furthermore attack the portal cap, a  
356 cap of HSV1-pUL25 or its homologs in other herpesviruses, which seals the pUL6 portal after DNA  
357 packaging is completed (Liu *et al.*, 2019; McElwee *et al.*, 2018; Döhner *et al.* 2021; Naniima *et al.*,  
358 2021). The high internal capsid pressure due to the negatively charged genome (Bauer *et al.*, 2013;  
359 Roos *et al.*, 2009) could support the MxB attack from the outside. The limited trypsin treatment  
360 might have primed the D capsids for disassembly, as they contained less pUL36, pUL17, pUL25, and  
361 pUL6 than the V capsids. However, MxB also attacked  $V_{0.5}$  capsids that resemble cytosolic capsids  
362 during nuclear targeting or after nuclear egress (Ojala *et al.*, 2000; Wolfstein *et al.*, 2006; Radtke *et*  
363 *al.*, 2010; Anderson *et al.*, 2014); just not as fast, and not as efficient. Altogether, these results  
364 suggest that increasing tegumentation protects incoming and newly assembled capsids, possibly by  
365 masking the MxB target structure, or by inhibiting its GTPase cycle.

366 The MxB-mediated capsid disassembly required its NTE(1-25), GTP hydrolysis, and dimerization.  
367 For the homologous MxA GTPase that limits infection of many RNA viruses (Haller *et al.*, 2015), Gao  
368 *et al.* (2011) proposed a restriction mechanism that involves GTP hydrolysis and a mechano-chemical  
369 coupling within ring-like oligomers with the GTPase domains being exposed on their outer diameter  
370 (Gao *et al.*, 2011). Similarly, MxB can also assemble into helical tubes with the NTE and the GTPase  
371 domain oriented outwards (Alvarez *et al.*, 2017). Accordingly, MxB monomers and dimers might  
372 associate with the capsid vertices and insert between the hexons of neighbouring capsid faces. A  
373 further oligomerization of MxB and/or conformational changes associated with GTP hydrolysis might  
374 then exert destabilizing forces onto the capsid shells, and ultimately push the capsid faces apart.

375 **Does MxB induce capsid disassembly in cells?** Future studies need to investigate whether MxB  
376 also induces the disassembly of herpesviral capsids in cells. Upon docking of an incoming capsid to a  
377 NPC, the pUL25 portal cap is supposed to be displaced, the pUL6 portal to be opened, and the DNA  
378 to be ejected from the capsid into the nucleoplasm due to this intramolecular repulsion (Brandariz-  
379 Nunez *et al.*, 2019; Döhner *et al.*, 2021; Ojala *et al.*, 2000; Rode *et al.*, 2011). In uninfected cells, there  
380 is a low amount of constitutively expressed MxB localized at the NPCs (Crameri *et al.*, 2018; Kane *et*  
381 *al.*, 2018; Melen & Julkunen, 1997), which might dislodge the portal cap and open the capsid portal  
382 on the incoming capsid to release the incoming genome into the nucleoplasm.

383 Crameri *et al.* (2018) proposed that the higher amounts of IFN-induced MxB may block cytosolic  
384 capsid transport, genome uncoating at the NPCs, and/or the release of viral genomes into the  
385 nucleoplasm, which is consistent with our biochemical data demonstrating MxB binding to HSV-1  
386 capsids. MxB-mediated disassembly of capsids that we report here would further reduce capsid  
387 targeting to the NPCs and genome release into the nucleoplasm. Accordingly, there are fewer HSV-1  
388 capsid puncta in MxB expressing cells (Crameri *et al.*, 2018). Consistent with our data on capsid  
389 disassembly with MxB(26-715), MxB(K131A), or MxB(M574D), restricting the infection of HSV-1,  
390 MCMV, and MHV68 also requires the NTE, GTP hydrolysis, and dimerization of MxB (Crameri *et al.*,  
391 2018; Schilling *et al.*, 2018). Restriction of HIV infection depends also on the NTE, to some extent on  
392 the MxB GTPase function, and on its dimerization (Buffone *et al.*, 2015; Fricke *et al.*, 2014; Goujon *et*

393 *al.*, 2014; Schulte *et al.*, 2015; Xie *et al.*, 2021). It will be interesting to determine whether MxB only  
394 competes for important HIV interactions with promoting host factors (reviewed in Temple *et al.*,  
395 2020), or whether it also induces HIV capsid disassembly.

396 Our data together with Schilling *et al.* (2018) and Crameri *et al.* (2018) suggest that the IFN-  
397 inducible MxB restricts HSV-1, HSV-2, VZV, and possibly other herpesviruses, by promoting efficient  
398 capsid disassembly. We cannot exclude that a surplus of capsid- and NPC-associated MxB imposes  
399 further restrictions on intracellular transport and genome release into the nucleoplasm. However, if  
400 MxB(1-715) would disassemble viral capsids before they are oriented properly with their portal  
401 towards the NPCs, their genomes would end up in the cytosol and would not be delivered into the  
402 nucleoplasm. There are fewer incoming cytoplasmic capsids in cells expressing MxB (Crameri *et al.*,  
403 2018), and incoming VP5 is ubiquitinated and degraded by proteasomes in macrophages (Horan *et*  
404 *al.*, 2013; Sun *et al.*, 2019). Therefore, capsid disassembly intermediates might be degraded in cells,  
405 while we could characterize them in our biochemical cell-free assays in which proteases had been  
406 blocked.

407 The viral genomes exposed after MxB-induced capsid disassembly might be degraded by the  
408 DNase TREX1 (Sun *et al.*, 2019), or stimulate the DNA sensors AIM2, cGAS, or IFI16, and the induction  
409 of antiviral host mechanisms. As an inoculation with destabilized HIV-1 capsids leads to an increased  
410 activation of the DNA sensor cGAS (Sumner *et al.*, 2020), the IFN-induced increased MxB expression  
411 might lead to a similar outcome in cells infected with herpesviruses. Accordingly, MxB may not only  
412 restrict herpesviruses by capsid disassembly, but also increase the exposure of viral genomes to  
413 cytosolic DNA sensors, which in turn would induce an IFN response, inflammation as well as innate  
414 and adaptive immune responses. Thus, MxB could be the long sought-after capsid sensor that  
415 destroys the sturdy herpesvirus capsids, and possibly HIV cores and other viral capsids, to promote  
416 host viral genome sensing.

## 417 **MATERIALS AND METHODS**



418 **Cells.** All cells were maintained in a humidified incubator at 37°C with 5% CO<sub>2</sub> and passaged twice  
419 per week. BHK-21 (ATCC CCL-10) and Vero cells (ATCC CCL-81) were cultured in MEM Eagle with 1%  
420 NEAA (Cytogen, Wetzlar, Germany) and 10% or 7.5% (v/v) FBS, respectively (Good Forte; PAN-  
421 Biotech, Aidenbach, Germany). THP-1 cells (ATCC TIB-202; kind gift from Walther Mothes, Yale  
422 University, New Haven, USA) were cultured in RPMI Medium 1640 (Thermo Fisher Scientific,  
423 Waltham, Massachusetts, United States) with 10% FBS (Thermo Fisher Scientific, Waltham,  
424 Massachusetts, United States). THP-1 were stimulated with 100 nM phorbol 12-myristate 13-acetate  
425 (PMA; Sigma-Aldrich, Germany) for 48 h and used immediately (M $\phi$ ) or after 3 days of rest (M $\phi$ <sub>R</sub>).  
426 The cells were cultured with 1000 U/mL human type I IFN- $\alpha$ 2a (M $\phi$ <sub>IFN</sub>; R&D Systems, Minneapolis,  
427 Minnesota, USA) or left untreated for 16 h.

428 A549 cells were cultured in DMEM with 10% FCS. In addition to A549 control cells, we used A549  
429 cell lines stably expressing MxB(1-715), MxB(1-715/K131A), MxB(1-715/T151A), MxB(1-715/M574D),  
430 MxB(26-715), or MxA(1-662) upon transduction with the respective pLVX vectors with an engineered  
431 Kozak sequence to favor expression of the MxB(1-715) over the MxB(26-715) proteins (Schilling et al.  
432 2018). Furthermore, we generated A549-MxBFLAG cells expressing MxB(1-715)FLAG and MxB(26-  
433 715)FLAG, both tagged with the FLAG epitope (GACTACAAAGACGATGACGACAAG) at the C-terminus  
434 of MxB (GenBank NM\_002463), and A549-MxB(1-715)-MxB(26-715) cells expressing untagged  
435 MxB(1-715) and MxB(26-715) using the pLKOD-Ires-Puro vector (Clontech Takara Bio, Mountain  
436 View, United States). MeWo cells (kind gift from Graham Ogg; University of Oxford, Oxford, UK) were  
437 cultured in MEM with 10% FCS, NEAA, and 1 mM sodium pyruvate.

438 **Viruses.** Virus stocks of HSV-1(17<sup>+</sup>)Lox (Sandbaumhüter *et al.*, 2013), HSV-1 strain KOS (Warner *et*  
439 *al.*, 1998; kind gift from Pat Spear, Northwestern Medical School, Chicago, USA), and HSV-2 strain  
440 333 (Warner *et al.*, 1998; kind gift from Helena Browne, Cambridge University, Cambridge, UK) were  
441 prepared as reported before (Döhner *et al.*, 2006; Grosche *et al.*, 2019). Extracellular particles were  
442 harvested from the supernatant of BHK-21 cells infected with 3 to 4 x 10<sup>4</sup> PFU/mL (MOI of  
443 0.01 PFU/cell) for 2 to 3 days until the cells had detached from the culture flasks, and plaque-titrated  
444 on Vero cells. VZV rOka (kind gift from Jeffrey Cohen, NIH, Bethesda, US) was maintained in infected

445 MeWo cells (Cohen & Seidel, 1993; Hertzog *et al.*, 2020). After 2 to 4 days, the VZV infected cells as  
446 indicated by cytopathic effects were harvested, mixed with naïve MeWo cells at a ratio of 1:4 to 1:8  
447 for continued culture. Aliquots of frozen infected cells were used to inoculate cultures used for  
448 capsid preparation.

449 **HSV-1 infection.** THP-1 were seeded at  $2.5 \times 10^5$  cells per 6-well, treated with 100 nM PMA  
450 (Sigma-Aldrich, Germany) for 48 h and used immediately ( $M\phi$ ) or after 3 days of rest ( $M\phi_R$ ). The cells  
451 were then induced with 1000 U/mL of IFN- $\alpha$  ( $M\phi_{IFN}$ ) or left untreated for 16 h. On the next day, they  
452 were inoculated with HSV-1(17<sup>+</sup>)Lox at  $2.5 \times 10^6$ ,  $2.5 \times 10^7$ , or  $5 \times 10^7$  PFU/mL (MOI of 5, 50, or 100  
453 respectively) in CO<sub>2</sub>-independent medium (Gibco Life Technologies) supplemented with 0.1% (w/v)  
454 cell culture grade fatty-acid free bovine serum albumin (BSA; PAA Laboratories GmbH) for 30 min,  
455 and then shifted to regular culture medium at 37°C and 5% CO<sub>2</sub>. At the indicated times, the cells and  
456 the corresponding media were harvested separately and snap-frozen in liquid nitrogen. These  
457 samples as well as and HSV-1 and HSV-2 inocula were titrated on Vero cells (Döhner *et al.*, 2006;  
458 Grosche *et al.*, 2019).

459 **Preparation of V<sub>0.1</sub>, V<sub>0.5</sub> and V<sub>1</sub> and D capsids.** Extracellular HSV-1 or HSV-2 particles were  
460 harvested by sedimentation at 12,000 rpm for 90 minutes at 4°C (Type 19 rotor, Beckman-Coulter)  
461 from the medium of BHK-21 cells (40 x 175 cm<sup>2</sup> flasks; 2 –  $2.5 \times 10^7$  cells/flask) infected with 0.01  
462 PFU/cell (2 to  $6.7 \times 10^4$  PFU/mL) for 2.5 days. The resulting medium pellets (MP) were resuspended in  
463 2 mL of MKT buffer (20 mM MES, 30 mM Tris-HCl, 100 mM KCl, pH 7.4; Grosche *et al.*, 2019; Radtke  
464 *et al.*, 2014; Turan *et al.*, 2019), treated with 0.5 mg/mL trypsin (Sigma-Aldrich, Germany) at 37°C for  
465 1 h which was then inactivated with 5 mg/mL trypsin inhibitor from soybean (SBTI; Fluka,  
466 Switzerland) for 10 min on ice. These samples were then mixed with an equal volume of 2-fold lysis  
467 buffer (2% TX-100, 20 mM MES, 30 mM Tris, pH 7.4, 20 mM DTT, 1x protease inhibitor cocktail [PIs,  
468 Roche cOmplete] with 0.2 M, 1 M or 2 M KCl; Radtke *et al.*, 2014). The samples were layered on top  
469 of 20% (w/v) sucrose cushions in 20 mM MES, 30 mM Tris, pH 7.4 with 10 mM DTT, PIs with the  
470 respective KCl concentration, and sedimented at 110,000 g for 20 min at 4°C (TLA-120.2 rotor,  
471 Beckman-Coulter). The supernatants and the cushions containing solubilized viral envelope and

472 tegument proteins were carefully removed. The pellets were resuspended in BRB80 (80 mM PIPES,  
473 pH 6.8, 12 mM MgCl<sub>2</sub>, 1 mM EGTA) with 10 mM DTT, PIs, 0.1 U/mL protease-free DNase I (Promega,  
474 USA), and 100 mg/mL protease-free RNase (Roth GmbH, Germany) for 1 h at 37°C and then overnight  
475 at 4°C. The capsids were sedimented at 110,000 g for 15 min at 4°C (TLA-120.2) and resuspended in  
476 capsid binding buffer (CBB: 5% [w/v] sucrose, 20 mM HEPES-KOH, pH 7.3, 80 mM K-acetate, 1 mM  
477 EGTA, 2 mM Mg-acetate, 10 mM DTT and PIs) by ultrasound tip sonication at 40 W for about 5 x 5  
478 seconds on ice. Furthermore, we treated V<sub>0.1</sub> capsids for 40 min at 37°C with 10 µg/mL trypsin in CBB  
479 lacking PIs to generate D capsids by limited digestion. After the addition of 5 mg/mL SBTI for 10 min  
480 on ice to block the trypsin activity, the D capsids were sedimented at 110,000 x g and 4°C for 15 min  
481 (TLA-120.2), and resuspended in CBB with PIs.

482 **Preparation of nuclear A, B, and C capsids.** HSV-1 nuclear capsids were prepared from 40 x 175  
483 cm<sup>2</sup> flasks with BHK-21 cells infected with 0.01 PFU/cell (3 to 4 x 10<sup>4</sup> PFU/mL) for about 2.5 days  
484 (Anderson *et al.*, 2014; Radtke *et al.*, 2010; Radtke *et al.*, 2014; Snijder *et al.*, 2017; Wolfstein *et al.*,  
485 2006). VZV nuclear capsids were harvested from infected MeWo cells cultured in 5 to 10 x 175 cm<sup>2</sup>  
486 flasks at maximum syncytia formation but before cell lysis. The cells were harvested, resuspended in  
487 MKT buffer (20 mM MES, 30 mM Tris, pH 7.4, 100 mM KCl), snap-frozen, and stored at -80°C. Nuclear  
488 A, B, and C capsids were separated by sedimentation at 50,000 x g and 4°C for 80 min (SW40Ti,  
489 Beckman Coulter) on linear 20 to 50% sucrose gradients in TKE buffer (20 mM Tris, pH 7.5, 500 mM  
490 KCl, 1 mM EDTA; diluted in three volumes of TKE supplemented with 2 mM DTT and PIs (Roche  
491 cOmplete). The capsids were sedimented in BSA-coated centrifuge tubes at 110,000 g at 4°C for 20  
492 min (TLA-120.2), resuspended in BRB80 buffer supplemented with 100 mg/mL RNase (Roth,  
493 Germany), 0.1 U/mL DNase I (M6101, Promega, USA), 10 mM DTT, and PIs, sedimented again, and  
494 resuspended in CBB with PIs.

495 **Calibration of capsid concentration.** To calibrate the amount of capsid equivalents (CAP<sub>eq</sub>)  
496 among different experiments, we compared all capsid preparations used in this study with a  
497 calibration curve generated from the same starting preparation. The capsids were suspended in  
498 sample buffer (1% [w/v] SDS, 50 mM Tris-HCl, pH 6.8, 1% [v/v] β-mercaptoethanol, 5% [v/v] glycerol,

499 PIs [Roche cOmplete]), and adsorbed to nitrocellulose membranes (BioTrace™, Pall Laboratory) using  
500 a 48-slot suction device (Bio-DOT-SF, Bio-Rad, Hercules, California, USA). The membranes were  
501 probed with a polyclonal rabbit serum raised against purified HSV-1 nuclear capsids (SY4563; Table  
502 S4; Döhner *et al.*, 2018) followed by secondary antibodies conjugated to fluorescent infrared dyes  
503 (donkey-anti-rabbit IgG-IRDye1 800CW; Table S3), and documented with an Infrared Imaging System  
504 (Odyssey, Image Studio Lite Quantification Software, LI-COR Biosciences, Lincoln, Nebraska, USA).  
505 MPs harvested from one 175 cm<sup>2</sup> flasks of BHK-21 cells infected with HSV-1 contained about 0.5 to 1  
506 x 10<sup>9</sup> PFU/mL, and 0.75 to 1.5 x 10<sup>9</sup> CAP<sub>eq</sub>/mL. A nuclear HSV-1 capsid fraction prepared from one  
507 175 cm<sup>2</sup> flask contained about 0.5 to 1 x 10<sup>7</sup> CAP<sub>eq</sub> of A capsids, 1 to 2 x 10<sup>7</sup> CAP<sub>eq</sub> of B capsids, and  
508 0.5 to 0.75 x 10<sup>7</sup> CAP<sub>eq</sub> of C capsids, and a nuclear VZV fraction from one 175 cm<sup>2</sup> flasks of MeWo  
509 cells 2 to 4 x 10<sup>5</sup> CAP<sub>eq</sub> of A capsids, 0.5 to 1 x 10<sup>6</sup> CAP<sub>eq</sub> of B capsids, and 0.8 to 1.6 x 10<sup>7</sup> CAP<sub>eq</sub> of C  
510 capsids. Capsid-host protein complexes were assembled *in-solution* using 7.5 x 10<sup>8</sup> CAP<sub>eq</sub>/condition  
511 for MS and immunoblot experiments, and for the *on-grid* electron microscopy assay 2 x 10<sup>7</sup>  
512 CAP<sub>eq</sub>/condition were used.

513 **Preparation of cytosol.** Cytosolic extracts were prepared as described before (Radtke *et al.*, 2010;  
514 Radtke *et al.*, 2014), dialyzed (7K MW cut-off cassettes; Slide-A-Lyzer™, Thermo Scientific), snap-  
515 frozen and stored at -80°C. Prior to their use, the cytosols were supplemented with 1 mM ATP, 1 mM  
516 GTP, 7 mM creatine phosphate, 5 mM DTT, and PIs (Roche cOmplete), and centrifuged at 130,000 g  
517 for 30 min at 4°C (TLA-120.2). We added nocodazole to 25 μM to the cytosols, and left them either  
518 untreated (ATP/GTP<sup>high</sup>) or supplemented them with 10 U/mL apyrase (Sigma; ATP/GTP<sup>low</sup>) for 15 min  
519 at RT.

520 **Assembly of capsid-host protein complexes *in-solution*.** Capsids were resuspended in CBB and  
521 cytosol at a protein concentration of 0.2 mg/mL in an assay volume of 60 μL per sample on a rotating  
522 platform at 800 rpm for 1 h at 37°C (c.f. Fig. S1). The capsid-host protein complexes were sedimented  
523 through a 30% sucrose cushion at 110,000 g for 20 min at 4°C (TLA-100, Beckman-Coulter),  
524 resuspended in CBB by ultrasound tip sonication at 40 W for about 5 x 5 seconds on ice, and analysed  
525 by mass spectrometry, immunoblot, or electron microscopy (Radtke *et al.*, 2014).

526        **SDS-PAGE and immunoblot.** The samples were lysed in Laemmli buffer (1% [w/v] SDS, 50 mM  
527 Tris-HCl, pH 6.8, 1% [v/v]  $\beta$ -mercaptoethanol, 5% [v/v] glycerol, bromophenol blue, PIs [Roche  
528 cComplete]). The proteins were separated on linear 7.5 to 12% or 10 to 15% SDS-PAGE, transferred to  
529 methanol-activated PVDF membranes, probed with rabbit or murine primary antibodies (Table S3)  
530 and secondary antibodies conjugated to fluorescent infrared dyes (anti-rabbit IgG-IRDye1 800CW;  
531 anti-mouse IgG-IRDye1 680RD; Table S3) and documented with an Infrared Imaging System (Odyssey,  
532 Image Studio Lite Quantification Software, LI-COR Biosciences, Lincoln, Nebraska, USA).

533        **Mass spectrometry sample preparation and measurement.** Capsid-host protein complexes were  
534 analysed by liquid chromatography coupled to tandem mass spectrometry (LC-MS/MS) in four  
535 independent biological replicates. The samples were resuspended in hot Laemmli buffer and  
536 separated in NuPAGE™ 4 to 12% Bis-Tris protein gels (Invitrogen) before *in-gel* digestion. Briefly,  
537 proteins were fixed and stained by Coomassie solution (0.4% G250, 30% methanol, 10% acetic acid).  
538 Sample lanes were excised, destained (50% ethanol, 25 mM ammonium bi-carbonate), dehydrated  
539 with 100% ethanol and dried using a SpeedVac centrifuge (Eppendorf, Concentrator plus). Gel pieces  
540 were rehydrated in trypsin solution (1/50 [w/w] trypsin/protein) overnight at 37°C. Tryptic peptides  
541 were extracted in extraction buffer (3% trifluoroacetic acid, 30% acetonitrile), dried using a SpeedVac  
542 centrifuge, resuspended in 2 M Tris-HCl buffer before reduction and alkylation using 10 mM Tris(2-  
543 carboxyethyl)phosphine, 40 mM 2-Chloroacetamide in 25 mM Tris-HCl pH 8.5. The peptides were  
544 purified, concentrated on StageTips with three C18 Empore filter discs (3M), separated on a liquid  
545 chromatography instrument, and analysed by mass spectrometry (EASY- nLC 1200 system on an LTQ-  
546 Orbitrap XL; Thermo Fisher Scientific) as described before (Hubel *et al.*, 2019). Peptides were loaded  
547 on a 20 cm reverse-phase analytical column (75  $\mu$ m column diameter; ReproSil-Pur C18-AQ 1.9  $\mu$ m  
548 resin; Dr. Maisch) and separated using a 120 min acetonitrile gradient. The mass spectrometer was  
549 operated in Data-Dependent Analysis mode (DDA, XCalibur software v.3.0, Thermo Fisher).

550        **Mass-spectrometry data analysis.** Raw files were processed with MaxQuant using iBAQ  
551 quantification and Match Between Runs option, and the protein groups were filtered with Perseus  
552 for reverse identification, modification site only identification, and MaxQuant contaminant list

553 (<https://maxquant.net/maxquant/>, v1.6.2.10; <https://maxquant.net/perseus/>, v1.6.5.0; Cox & Mann, 2008;  
554 Tyanova *et al.*, 2016a; Tyanova *et al.*, 2016b). The iBAQ intensities were normalized across all  
555 samples to the overall median intensity of the HSV-1 capsid protein VP5. Cytosol and beads  
556 incubated with cytosol samples were normalized to all proteins detected in at least three replicates  
557 in each condition. Significant differences between given conditions were determined by a two-sided  
558 Welch t-test on protein groups present in three replicates of at least one condition, followed by  
559 permutation-based FDR statistics (250 permutations), using an absolute  $\log_2$  difference cut-off of 1.5  
560 and an FDR cut-off of 0.01. To characterize the IFN induction, we annotated proteins reported as  
561 being induced by IFN type-I as ISGs proteins (InterferomeDB, > 2x change;  
562 <http://www.interferome.org/interferome/home.jsp>; Rusinova *et al.*, 2013). We used the Fisher's exact  
563 test against ISGs proteins as well as all Gene Ontology (GO) terms for enrichment analysis of proteins  
564 upregulated in IFN-induced  $M\phi_{IFN}$  cytosol over  $M\phi_R$  cytosol ( $\log_2$  difference  $\geq 1.5$ ; unadjusted  
565 p-value < 0.05). The data were summarized in volcano or bar plots (GraphPad Prism v5.0,  
566 <https://www.graphpad.com/>; Perseus v1.6.5.0; Tyanova *et al.*, 2016b).

567 **Interaction Network Assembly.** We focused our analysis on proteins that showed specific  
568 differences from one capsid preparation to the other, within the same cytosol preparation, and  
569 considered host proteins with an enrichment higher than 1.5  $\log_2$  fold changes and a permutation-  
570 based FDR < 0.05 as specifically enriched. To visualize enrichment among different capsid-host  
571 protein complexes, we generated integrative networks using Cytoscape (<http://www.cytoscape.org/>;  
572 v3.7.2) and STRING (confidence score: 0.7; Szklarczyk *et al.*, 2019). STRING uses a combination of  
573 databases on co-expression, conserved occurrences, GO terms and Kyoto Encyclopedia of Genes and  
574 Genomes (KEGG; <https://www.genome.jp/kegg/>; Kanehisa & Goto, 2000; Kanehisa, 2019; Kanehisa *et al.*, 2021). To assemble pathway enrichments, we used DAVID, a Database for Annotation,  
575 Visualization and Integrated Discovery (<https://david.ncicrf.gov/home.jsp>; v6.8; Huang da *et al.*, 2009a;  
576 Huang da *et al.*, 2009b) and the Cytoscape plug-ins ClueGO and CluePedia  
577 (<http://apps.cytoscape.org/apps/cluego>, v2.5.7; <http://apps.cytoscape.org/apps/cluepedia>, v1.5.7; Bindea *et al.*, 2009; Bindea *et al.*, 2013).

580       **Electron microscopy.** Capsid-host protein complexes were assembled at ATP/GTP<sup>high</sup> in solution,  
581 harvested by ultracentrifugation, resuspended in CBB, and adsorbed onto enhanced hydrophilicity-  
582 400 mesh formvar- and carbon-coated copper grids (Stork Veco, The Netherlands; Radtke *et al.*,  
583 2010; Roos *et al.*, 2009). Moreover, capsids at a concentration of  $1 \times 10^7$  CAP<sub>eq</sub>/mL were adsorbed  
584 directly for 20 min at RT onto the grids. The grids were incubated on a 10  $\mu$ L drop of cytosol with a  
585 protein concentration of 0.2 mg/mL and ATP/GTP<sup>high</sup> in a humid chamber for 1 h at 37°C. The samples  
586 were left untreated or labelled with anti-VP5 (pAb NC-1) and protein-A gold (10 nm diameter; Cell  
587 Microscopy Centre, Utrecht School of Medicine, The Netherlands). For both protocols, the grids were  
588 washed with PBS and ddH<sub>2</sub>O, contrasted with 2% uranyl acetate at pH 4.4, air dried, and analysed by  
589 transmission electron microscopy (Morgani or Tecnai; FEI, Eindhoven, The Netherlands). The capsid  
590 morphology was evaluated for about 100 structures/assay from about 15 randomly selected images  
591 of 2.7  $\mu$ m<sup>2</sup> of three biological replicates. We classified capsomer-containing structures as *punched*, if  
592 they lacked one or more of their vertices but still had an icosahedral shape, and as *flat shells*, if they  
593 lacked the icosahedral shape but contained capsomers, and scored them as one capsid equivalent  
594 structure if they contained more than 100 capsomers.

595       **Capsid DNA uncoating assay.** D capsids were incubated with cytosols from A549-control,  
596 A549-MxB(1-715), A549-MxB(M574D), or A549-MxB-FLAG for 1 h at 37°C or treated for 5 min with  
597 1% SDS followed by 10 min with 10% TX-100(Ojala *et al.*, 2000). The viral genomes released during  
598 the assay were degraded by adding 50 U/mL of benzonase for 1 h at 37°C, and the remaining  
599 protected DNA was purified with the DNA Blood Mini Kit (Qiagen, Hilden, Germany) and quantified  
600 by real-time PCR on a qTower<sup>3</sup> (Analytik Jena, Jena, Germany). The SYBR Green assay was performed  
601 with the Luna Universal qPCR Master Mix (NEB, Ipswich, MA, USA) according to the manufacturer's  
602 instructions with primers specific for HSV-1 gB (UL27 gene) (HSV1\_2 SYBR fwd: 5'-  
603 gtagccgtaaaacggggaca-3' and HSV1\_2 SYBR rev: 5'-ccgacctcaagtacaacccc-3'; Engelmann *et al.*, 2008).  
604 Standards and samples were run in triplicates and results expressed as % released viral DNA with the  
605 SDS/Tx-100 treatment normalized to 100%.

606 **Quantification and statistical analyses.** We performed Welch's t-testing, Kruskal-Wallis H-testing,  
607 Friedman and one-way analyses of variance with a Dunns or Bonferroni post-testing (GraphPad Prism  
608 v5.0; <https://www.graphpad.com/>).

609 **Data availability:** The datasets produced in this study are available at PRIDE (PXD028276;  
610 <http://www.ebi.ac.uk/pride>). The published article will include all datasets generated and analysed.

## 611 **ACKNOWLEDGMENT**

612 We thank Katinka Döhner and Franziska Hüsters (Institute of Virology, Hannover Medical School)  
613 as well as Miriam Schilling (University of Oxford, UK) for many constructive discussions and feedback  
614 on the manuscript, and Jasper Götting (Institute of Virology, Hannover Medical School) for support  
615 on bioinformatics analyses. We are grateful to Ari Helenius (ETH Zürich, Switzerland), Graham Ogg  
616 (University of Oxford, UK), Gary Cohen (University of Pennsylvania, USA), Helena Browne (Cambridge  
617 University, UK), Jay Brown (University of Virginia, USA), Jeffrey Cohen (NIH, Bethesda, USA), Pat  
618 Spear (Northwestern Medical School, USA), and Roselyn Eisenberg (University of Pennsylvania, USA)  
619 for their generous donation of virus strains and invaluable antibodies.

620 Our research was supported by the EU 7<sup>th</sup> framework (Marie-Curie Actions ITN-EDGE;  
621 [https://ec.europa.eu/research/mariecurieactions/about/innovative-training-networks\\_en](https://ec.europa.eu/research/mariecurieactions/about/innovative-training-networks_en), H2020-EU.1.3.1,  
622 #675278 to JR, AP, and BS), the UK MRC (core funding of the Medical Research Council Human  
623 Immunology Unit to JR), the NIH (NIGMS, GM114141 to IMC), an EU ERC consolidator grant (ERC-CoG  
624 ProDAP 817798 to AP), and the German Research Foundation (<http://www.dfg.de/>; PI1084/3,  
625 PI1084/4, PI1084/5, TRR179, and TRR237 to AP; KO1579/13 to GK; CRC900 C2 158989968, EXC62  
626 REBIRTH 24102914, EXC2155 RESIST 390874280, SO403/6 to BS). The funders had no role in study  
627 design, data collection and analysis, decision to publish, or preparation of the manuscript.

## 628 **AUTHOR CONTRIBUTIONS**

629 MCS and BS conceived and wrote the article. MCS, VG, APir, AHM, TG, FA, IC, APic, and BS  
630 contributed to the development of methodology. MCS, VG, SW, and ARN performed experiments



631 and curated the respective data. MCS, VG, APir, APic, and BS analysed the data. MCS, AHM, JH, AB,  
632 APo, UP, and SW produced the resources used in this study. FA, SW, TG, RB, IC, JR, and GK  
633 contributed to the analysis of the data and the discussion of the content. All authors reviewed and  
634 edited the manuscript before submission.

## 635 **COMPETING INTEREST**

636 The authors have declared that no competing interests exist.

## 637 REFERENCES

- 638 Alvarez FJD, He S, Perilla JR, Jang S, Schulten K, Engelman AN, Scheres SHW, & Zhang P (2017)  
639 CryoEM structure of MxB reveals a novel oligomerization interface critical for HIV restriction. *Sci*  
640 *Adv* **3**: e1701264
- 641 Anderson F, Savulescu AF, Rudolph K, Schipke J, Cohen I, Ibricic I, Rotem A, Grunewald K, Sodeik B, &  
642 Harel A (2014) Targeting of viral capsids to nuclear pores in a cell-free reconstitution system.  
643 *Traffic* **15**: 1266-1281
- 644 Arvin AM & Abendroth A (2021) Varicella–Zoster Virus. In *Fields Virology: DNA Viruses*, Howley PM,  
645 Knipe DM, Cohen JL, Damania BA (eds) pp 445-488. Wolters Kluwer Health/Lippincott Williams &  
646 Wilkins; 7th edition (May 17, 2021): Berlin, Heidelberg
- 647 Ashburner M, Ball CA, Blake JA, Botstein D, Butler H, Cherry JM, Davis AP, Dolinski K, Dwight SS, Eppig  
648 JT, Harris MA, Hill DP, Issel-Tarver L, Kasarskis A, Lewis S, Matese JC, Richardson JE, Ringwald M,  
649 Rubin GM, & Sherlock G (2000) Gene ontology: tool for the unification of biology. The Gene  
650 Ontology Consortium. *Nat Genet* **25**: 25-29
- 651 Bauer DW, Huffman JB, Homa FL, & Evilevitch A (2013) Herpes virus genome, the pressure is on. *J Am*  
652 *Chem Soc* **135**: 11216-11221
- 653 Betancor G, Dicks MDJ, Jimenez-Guardeño JM, Ali NH, Apolonia L, & Malim MH (2019) The GTPase  
654 Domain of MX2 Interacts with the HIV-1 Capsid, Enabling Its Short Isoform to Moderate Antiviral  
655 Restriction. *Cell Rep* **29**: 1923-1933.e3
- 656 Bindea G, Galon J, & Mlecnik B (2013) CluePedia Cytoscape plugin: pathway insights using integrated  
657 experimental and in silico data. *Bioinformatics* **29**: 661-663
- 658 Bindea G, Mlecnik B, Hackl H, Charoentong P, Tosolini M, Kirilovsky A, Fridman WH, Pages F,  
659 Trajanoski Z, & Galon J (2009) ClueGO: a Cytoscape plug-in to decipher functionally grouped gene  
660 ontology and pathway annotation networks. *Bioinformatics* **25**: 1091-1093
- 661 Brandariz-Nunez A, Liu T, Du T, & Evilevitch A (2019) Pressure-driven release of viral genome into a  
662 host nucleus is a mechanism leading to herpes infection. *Elife* **8**: 10.7554/eLife.47212
- 663 Buffone C, Schulte B, Opp S, & Diaz-Griffero F (2015) Contribution of MxB oligomerization to HIV-1  
664 capsid binding and restriction. *J Virol* **89**: 3285-3294
- 665 Cabrera JR, Manivanh R, North BJ, & Leib DA (2019) The ESCRT-Related ATPase Vps4 Is Modulated by  
666 Interferon during Herpes Simplex Virus 1 Infection. *mBio* **10**: 10.1128/mBio.02567-18
- 667 Cao H, Krueger EW, Chen J, Drizyte-Miller K, Schulz ME, & McNiven MA (2020) The anti-viral dynamin  
668 family member MxB participates in mitochondrial integrity. *Nat Commun* **11**: 1048-w
- 669 Carter-Timofte ME, Paludan SR, & Mogensen TH (2018) RNA Polymerase III as a Gatekeeper to  
670 Prevent Severe VZV Infections. *Trends Mol Med* **24**: 904-915
- 671 Chen Y, Zhang L, Graf L, Yu B, Liu Y, Kochs G, Zhao Y, & Gao S (2017) Conformational dynamics of  
672 dynamin-like MxA revealed by single-molecule FRET. *Nat Commun* **8**: 15744
- 673 Cohen GH, Ponce de Leon M, Diggelmann H, Lawrence WC, Vernon SK, & Eisenberg RJ (1980)  
674 Structural analysis of the capsid polypeptides of herpes simplex virus types 1 and 2. *J Virol* **34**:  
675 521-531
- 676 Cohen JI & Seidel KE (1993) Generation of varicella-zoster virus (VZV) and viral mutants from cosmid  
677 DNAs: VZV thymidylate synthetase is not essential for replication in vitro. *Proc Natl Acad Sci U S A*  
678 **90**: 7376-7380
- 679 Coller KE, Lee JI, Ueda A, & Smith GA (2007) The capsid and tegument of the alphaherpesviruses are  
680 linked by an interaction between the UL25 and VP1/2 proteins. *J Virol* **81**: 11790-11797
- 681 Cox J & Mann M (2008) MaxQuant enables high peptide identification rates, individualized p.p.b.-  
682 range mass accuracies and proteome-wide protein quantification. *Nat Biotechnol* **26**: 1367-1372

- 683 Cramer M, Bauer M, Caduff N, Walker R, Steiner F, Franzoso FD, Gujer C, Boucke K, Kucera T,  
684 Zbinden A, Munz C, Fraefel C, Greber UF, & Pavlovic J (2018) MxB is an interferon-induced  
685 restriction factor of human herpesviruses. *Nat Commun* **9**: 1980-2
- 686 Crump CM (2018) Virus Assembly and Egress of HSV. *Adv Exp Med Biol* **1045**: 23-44
- 687 Crump CM, Yates C, & Minson T (2007) Herpes simplex virus type 1 cytoplasmic envelopment  
688 requires functional Vps4. *J Virol* **81**: 7380-7387
- 689 Dai X & Zhou ZH (2018) Structure of the herpes simplex virus 1 capsid with associated tegument  
690 protein complexes. *Science* **360**: 10.1126/science.aao7298. Epub 2018 Apr 5
- 691 Diefenbach RJ (2015) Conserved tegument protein complexes: Essential components in the assembly  
692 of herpesviruses. *Virus Res* **210**: 308-317
- 693 Döhner K, Cornelius A, Serrero MC, & Sodeik B (2021) Herpesvirus Capsids on Their Journey to the  
694 Center of the Cell. *Current Opinion of Virology* **50**: 147-158
- 695 Döhner K, Ramos-Nascimento A, Bialy D, Anderson F, Hickford-Martinez A, Rother F, Koithan T,  
696 Rudolph K, Buch A, Prank U, Binz A, Hugel S, Lebbink RJ, Hoeben RC, Hartmann E, Bader M,  
697 Bauerfeind R, & Sodeik B (2018) Importin alpha1 is required for nuclear import of herpes simplex  
698 virus proteins and capsid assembly in fibroblasts and neurons. *PLoS Pathog* **14**: e1006823
- 699 Döhner K, Radtke K, Schmidt S, & Sodeik B (2006) Eclipse phase of herpes simplex virus type 1  
700 infection: Efficient dynein-mediated capsid transport without the small capsid protein VP26. *J*  
701 *Virol* **80**: 8211-8224
- 702 Engelmann I, Petzold DR, Kosinska A, Hepkema BG, Schulz TF, & Heim A (2008) Rapid quantitative  
703 PCR assays for the simultaneous detection of herpes simplex virus, varicella zoster virus,  
704 cytomegalovirus, Epstein-Barr virus, and human herpesvirus 6 DNA in blood and other clinical  
705 specimens. *J Med Virol* **80**: 467-477
- 706 Everett RD, Meredith M, Orr A, Cross A, Kathoria M, & Parkinson J (1997) A novel ubiquitin-specific  
707 protease is dynamically associated with the PML nuclear domain and binds to a herpesvirus  
708 regulatory protein. *EMBO J* **16**: 1519-1530
- 709 Flohr F, Schneider-Schaulies S, Haller O, & Kochs G (1999) The central interactive region of human  
710 MxA GTPase is involved in GTPase activation and interaction with viral target structures. *FEBS Lett*  
711 **463**: 24-28
- 712 Fribourgh JL, Nguyen HC, Matreyek KA, Alvarez FJD, Summers BJ, Dewdney TG, Aiken C, Zhang P,  
713 Engelman A, & Xiong Y (2014) Structural insight into HIV-1 restriction by MxB. *Cell Host Microbe*  
714 **16**: 627-638
- 715 Fricke T, White TE, Schulte B, de Souza Aranha Vieira, D. A., Dharan A, Campbell EM, Brandariz-Nunez  
716 A, & Diaz-Griffero F (2014) MxB binds to the HIV-1 core and prevents the uncoating process of  
717 HIV-1. *Retrovirology* **11**: 68-x
- 718 Gao S, von der Malsburg A, Dick A, Faelber K, Schroder GF, Haller O, Kochs G, & Daumke O (2011)  
719 Structure of myxovirus resistance protein a reveals intra- and intermolecular domain interactions  
720 required for the antiviral function. *Immunity* **35**: 514-525
- 721 Gene Ontology Consortium (2021) The Gene Ontology resource: enriching a GOld mine. *Nucleic Acids*  
722 *Res* **49**: D325-D334
- 723 Gershon AA, Breuer J, Cohen JI, Cohrs RJ, Gershon MD, Gildea D, Grose C, Hambleton S, Kennedy PG,  
724 Oxman MN, Seward JF, & Yamanishi K (2015) Varicella zoster virus infection. *Nat Rev Dis Primers*  
725 **1**: 15016
- 726 Goujon C, Moncorge O, Bauby H, Doyle T, Barclay WS, & Malim MH (2014) Transfer of the amino-  
727 terminal nuclear envelope targeting domain of human MX2 converts MX1 into an HIV-1 resistance  
728 factor. *J Virol* **88**: 9017-9026
- 729 Goujon C, Moncorge O, Bauby H, Doyle T, Ward CC, Schaller T, Hue S, Barclay WS, Schulz R, & Malim  
730 MH (2013) Human MX2 is an interferon-induced post-entry inhibitor of HIV-1 infection. *Nature*  
731 **502**: 559-562

- 732 Grosche L, Döhner K, Düthorn A, Hickford-Martinez A, Steinkasserer A, & Sodeik B (2019) Herpes  
733 Simplex Virus Type 1 Propagation, Titration and Single-step Growth Curves. *Bio-protocol*: e3441
- 734 Haller O, Staeheli P, Schwemmler M, & Kochs G (2015) Mx GTPases: dynamin-like antiviral machines  
735 of innate immunity. *Trends Microbiol* **23**: 154-163
- 736 Hammond C & Helenius A (1994) Quality control in the secretory pathway: retention of a misfolded  
737 viral membrane glycoprotein involves cycling between the ER, intermediate compartment, and  
738 Golgi apparatus. *J Cell Biol* **126**: 41-52
- 739 Hertzog J, Rigby RE, Roll S, Cursi C, Chauveau L, Davenne T, & Rehwinkel J (2021) Varicella-Zoster  
740 Virus ORF9 Is an Antagonist of the DNA Sensor cGAS. *bioRxiv*: 2020.02.11.943415v2
- 741 Hertzog J & Rehwinkel J (2020) Regulation and inhibition of the DNA sensor cGAS. *EMBO Rep* **21**:  
742 e51345
- 743 Horan KA, Hansen K, Jakobsen MR, Holm CK, Soby S, Unterholzner L, Thompson M, West JA, Iversen  
744 MB, Rasmussen SB, Ellermann-Eriksen S, Kurt-Jones E, Landolfo S, Damania B, Melchjorsen J,  
745 Bowie AG, Fitzgerald KA, & Paludan SR (2013) Proteasomal degradation of herpes simplex virus  
746 capsids in macrophages releases DNA to the cytosol for recognition by DNA sensors. *J Immunol*  
747 **190**: 2311-2319
- 748 Huang da W, Sherman BT, & Lempicki RA (2009a) Bioinformatics enrichment tools: paths toward the  
749 comprehensive functional analysis of large gene lists. *Nucleic Acids Res* **37**: 1-13
- 750 Huang da W, Sherman BT, & Lempicki RA (2009b) Systematic and integrative analysis of large gene  
751 lists using DAVID bioinformatics resources. *Nat Protoc* **4**: 44-57
- 752 Hubel P, Urban C, Bergant V, Schneider WM, Knauer B, Stukalov A, Scaturro P, Mann A, Brunotte L,  
753 Hoffmann HH, Schoggins JW, Schwemmler M, Mann M, Rice CM, & Pichlmair A (2019) A protein-  
754 interaction network of interferon-stimulated genes extends the innate immune system landscape.  
755 *Nat Immunol* **20**: 493-502
- 756 Huet A, Makhov AM, Huffman J, Vos M, Homa FL, & Conway JF (2016) Extensive subunit contacts  
757 underpin herpesvirus capsid stability and interior-to-exterior allostery. *Nat Struct & Mol Biol* **23**:  
758 531-540
- 759 Huffmaster NJ, Sollars PJ, Richards AL, Pickard GE, & Smith GA (2015) Dynamic ubiquitination drives  
760 herpesvirus neuroinvasion. *Proc Natl Acad Sci U S A* **112**: 12818-12823
- 761 Justice JL, Kennedy MA, Hutton JE, Liu D, Song B, Phelan B, & Cristea IM (2021) Systematic profiling of  
762 protein complex dynamics reveals DNA-PK phosphorylation of IFI16 en route to herpesvirus  
763 immunity. *Sci Adv* **7**: 10.1126/sciadv.abg6680. Print 2021 Jun
- 764 Kane M, Yadav SS, Bitzegeio J, Kutluay SB, Zang T, Wilson SJ, Schoggins JW, Rice CM, Yamashita M,  
765 Hatzioannou T, & Bieniasz PD (2013) MX2 is an interferon-induced inhibitor of HIV-1 infection.  
766 *Nature* **502**: 563-566
- 767 Kane M, Rebensburg SV, Takata MA, Zang TM, Yamashita M, Kvaratskhelia M, & Bieniasz PD (2018)  
768 Nuclear pore heterogeneity influences HIV-1 infection and the antiviral activity of MX2. *Elife* **7**:  
769 10.7554/eLife.35738
- 770 Kanehisa M (2019) Toward understanding the origin and evolution of cellular organisms. *Protein Sci*  
771 **28**: 1947-1951
- 772 Kanehisa M, Furumichi M, Sato Y, Ishiguro-Watanabe M, & Tanabe M (2021) KEGG: integrating  
773 viruses and cellular organisms. *Nucleic Acids Res* **49**: D545-D551
- 774 Kanehisa M & Goto S (2000) KEGG: kyoto encyclopedia of genes and genomes. *Nucleic Acids Res* **28**:  
775 27-30
- 776 King MC, Raposo G, & Lemmon MA (2004) Inhibition of nuclear import and cell-cycle progression by  
777 mutated forms of the dynamin-like GTPase MxB. *Proc Natl Acad Sci U S A* **101**: 8957-8962
- 778 Knipe DM, Heldwein EE, Mohr IJ, Sodroski CN (2021) Herpes Simplex Viruses: Mechanisms of Lytic  
779 and Latent Infection. In *Fields Virology: DNA Viruses*, Howley PM, Knipe DM, Cohen JL, Damania

- 780 BA (eds) pp 235-296. Wolters Kluwer Health/Lippincott Williams & Wilkins; 7th edition (May 17,  
781 2021)
- 782 Kurt-Jones EA, Orzalli MH, & Knipe DM (2017) Innate Immune Mechanisms and Herpes Simplex Virus  
783 Infection and Disease. *Adv Anat Embryol Cell Biol* **223**: 49-75
- 784 Liu SY, Sanchez DJ, Aliyari R, Lu S, & Cheng G (2012) Systematic identification of type I and type II  
785 interferon-induced antiviral factors. *Proc Natl Acad Sci U S A* **109**: 4239-4244
- 786 Liu YT, Jih J, Dai X, Bi GQ, & Zhou ZH (2019) Cryo-EM structures of herpes simplex virus type 1 portal  
787 vertex and packaged genome. *Nature* **570**: 257-261
- 788 Liu Z, Pan Q, Ding S, Qian J, Xu F, Zhou J, Cen S, Guo F, & Liang C (2013) The interferon-inducible MxB  
789 protein inhibits HIV-1 infection. *Cell Host Microbe* **14**: 398-410
- 790 Lum KK & Cristea IM (2021) Host Innate Immune Response and Viral Immune Evasion During  
791 Alphaherpesvirus Infection. *Curr Issues Mol Biol* **42**: 635-686
- 792 Ma Z, Ni G, & Damania B (2018) Innate Sensing of DNA Virus Genomes. *Annu Rev Virol* **5**: 341-362
- 793 McElwee M, Vijayakrishnan S, Rixon F, & Bhella D (2018) Structure of the herpes simplex virus portal-  
794 vertex. *PLoS Biol* **16**: e2006191
- 795 Melen K & Julkunen I (1997) Nuclear cotransport mechanism of cytoplasmic human MxB protein. *J*  
796 *Biol Chem* **272**: 32353-32359
- 797 Melen K, Keskinen P, Ronni T, Sareneva T, Lounatmaa K, & Julkunen I (1996) Human MxB protein, an  
798 interferon-alpha-inducible GTPase, contains a nuclear targeting signal and is localized in the  
799 heterochromatin region beneath the nuclear envelope. *J Biol Chem* **271**: 23478-23486
- 800 Naniima P, Naimo E, Koch S, Curth U, Alkharsah KR, Stroh LJ, Binz A, Beneke JM, Vollmer B, Boning H,  
801 Borst EM, Desai P, Bohne J, Messerle M, Bauerfeind R, Legrand P, Sodeik B, Schulz TF, & Krey T  
802 (2021) Assembly of infectious Kaposi's sarcoma-associated herpesvirus progeny requires  
803 formation of a pORF19 pentamer. *PLoS Biol* **19**: e3001423
- 804 Newcomb WW & Brown JC (1991) Structure of the herpes simplex virus capsid: effects of extraction  
805 with guanidine hydrochloride and partial reconstitution of extracted capsids. *J Virol* **65**: 613-620
- 806 Ojala PM, Sodeik B, Ebersold MW, Kutay U, & Helenius A (2000) Herpes simplex virus type 1 entry  
807 into host cells: reconstitution of capsid binding and uncoating at the nuclear pore complex in  
808 vitro. *Mol Cell Biol* **20**: 4922-4931
- 809 Page HG & Read GS (2010) The virion host shutoff endonuclease (UL41) of herpes simplex virus  
810 interacts with the cellular cap-binding complex eIF4F. *J Virol* **84**: 6886-6890
- 811 Paludan SR, Reinert LS, & Hornung V (2019) DNA-stimulated cell death: implications for host defence,  
812 inflammatory diseases and cancer. *Nat Rev Immunol* **19**: 141-153
- 813 Pilla C, Emanuelli T, Frassetto SS, Battastini AM, Dias RD, & Sarkis JJ (1996) ATP diphosphohydrolase  
814 activity (apyrase, EC 3.6.1.5) in human blood platelets. *Platelets* **7**: 225-230
- 815 Radtke K, Anderson F, & Sodeik B (2014) A precipitation-based assay to analyze interactions of viral  
816 particles with cytosolic host factors. *Methods Mol Biol* **1144**: 191-208
- 817 Radtke K, Kieneke D, Wolfstein A, Michael K, Steffen W, Scholz T, Karger A, & Sodeik B (2010) Plus-  
818 and minus-end directed microtubule motors bind simultaneously to herpes simplex virus capsids  
819 using different inner tegument structures. *PLoS Pathog* **6**: e1000991
- 820 Rode K, Döhner K, Binz A, Glass M, Strive T, Bauerfeind R, & Sodeik B (2011) Uncoupling uncoating of  
821 herpes simplex virus genomes from their nuclear import and gene expression. *J Virol* **85**: 4271-  
822 4283
- 823 Rodriguez MC, Dybas JM, Hughes J, Weitzman MD, & Boutell C (2020) The HSV-1 ubiquitin ligase  
824 ICP0: Modifying the cellular proteome to promote infection. *Virus Res* **285**: 198015
- 825 Roos WH, Radtke K, Kniesmeijer E, Geertsema H, Sodeik B, & Wuite GJ (2009) Scaffold expulsion and  
826 genome packaging trigger stabilization of herpes simplex virus capsids. *Proc Natl Acad Sci U S A*  
827 **106**: 9673-9678

- 828 Rusinova I, Forster S, Yu S, Kannan A, Masse M, Cumming H, Chapman R, & Hertzog PJ (2013)  
829 Interferome v2.0: an updated database of annotated interferon-regulated genes. *Nucleic Acids*  
830 *Res* **41**: 1040
- 831 Sae-Ueng U, Liu T, Catalano CE, Huffman JB, Homa FL, & Evilevitch A (2014) Major capsid  
832 reinforcement by a minor protein in herpesviruses and phage. *Nucleic Acids Res* **42**: 9096-9107
- 833 Sandbaumhüter M, Döhner K, Schipke J, Binz A, Pohlmann A, Sodeik B, & Bauerfeind R (2013)  
834 Cytosolic herpes simplex virus capsids not only require binding inner tegument protein pUL36 but  
835 also pUL37 for active transport prior to secondary envelopment. *Cell Microbiol* **15**: 248-269
- 836 Schilling M, Bulli L, Weigang S, Graf L, Naumann S, Patzina C, Wagner V, Bauersfeld L, Goujon C,  
837 Hengel H, Halenius A, Ruzsics Z, Schaller T, & Kochs G (2018) Human MxB Protein Is a Pan-  
838 herpesvirus Restriction Factor. *J Virol* **92**: 10.1128/JVI.01056-18. Print 2018 Sep 1
- 839 Schipke J, Pohlmann A, Diestel R, Binz A, Rudolph K, Nagel CH, Bauerfeind R, & Sodeik B (2012) The C  
840 terminus of the large tegument protein pUL36 contains multiple capsid binding sites that function  
841 differently during assembly and cell entry of herpes simplex virus. *J Virol* **86**: 3682-3700
- 842 Schneider SM, Lee BH, & Nicola AV (2021) Viral entry and the ubiquitin-proteasome system. *Cell*  
843 *Microbiol* **23**: e13276
- 844 Schulte B, Buffone C, Opp S, Di Nunzio F, De Souza Aranha Vieira, D. A., Brandariz-Nunez A, & Diaz-  
845 Griffero F (2015) Restriction of HIV-1 Requires the N-Terminal Region of MxB as a Capsid-Binding  
846 Motif but Not as a Nuclear Localization Signal. *J Virol* **89**: 8599-8610
- 847 Shannon P, Markiel A, Ozier O, Baliga NS, Wang JT, Ramage D, Amin N, Schwikowski B, & Ideker T  
848 (2003) Cytoscape: a software environment for integrated models of biomolecular interaction  
849 networks. *Genome Res* **13**: 2498-2504
- 850 Smaga SS, Xu C, Summers BJ, Digianantonio KM, Perilla JR, & Xiong Y (2019) MxB Restricts HIV-1 by  
851 Targeting the Tri-hexamer Interface of the Viral Capsid. *Structure* **27**: 1234-1245.e5
- 852 Snijder J, Radtke K, Anderson F, Scholtes L, Corradini E, Baines J, Heck AJR, Wuite GJL, Sodeik B, &  
853 Roos WH (2017) Vertex-Specific Proteins pUL17 and pUL25 Mechanically Reinforce Herpes  
854 Simplex Virus Capsids. *J Virol* **91**: 10.1128/JVI.00123-17. Print 2017 Jun 15
- 855 Stempel M, Chan B, & Brinkmann MM (2019) Coevolution pays off: Herpesviruses have the license to  
856 escape the DNA sensing pathway. *Med Microbiol Immunol* **208**: 495-512
- 857 Sumner RP, Harrison L, Touizer E, Peacock TP, Spencer M, Zuliani-Alvarez L, & Towers GJ (2020)  
858 Disrupting HIV-1 capsid formation causes cGAS sensing of viral DNA. *EMBO J* **39**: e103958
- 859 Sun C, Luecke S, Bodda C, Jonsson KL, Cai Y, Zhang BC, Jensen SB, Nordentoft I, Jensen JM, Jakobsen  
860 MR, & Paludan SR (2019) Cellular Requirements for Sensing and Elimination of Incoming HSV-1  
861 DNA and Capsids. *J Interferon Cytokine Res* **39**: 191-204
- 862 Szklarczyk D, Gable AL, Lyon D, Junge A, Wyder S, Huerta-Cepas J, Simonovic M, Doncheva NT, Morris  
863 JH, Bork P, Jensen LJ, & Mering CV (2019) STRING v11: protein-protein association networks with  
864 increased coverage, supporting functional discovery in genome-wide experimental datasets.  
865 *Nucleic Acids Res* **47**: D607-D613
- 866 Temple J, Tripler TN, Shen Q, & Xiong Y (2020) A snapshot of HIV-1 capsid-host interactions. *Curr Res*  
867 *Struct Biol* **2**: 222-228
- 868 Tsuchiya S, Yamabe M, Yamaguchi Y, Kobayashi Y, Konno T, & Tada K (1980) Establishment and  
869 characterization of a human acute monocytic leukemia cell line (THP-1). *Int J Cancer* **26**: 171-176
- 870 Turan A, Grosche L, Krawczyk A, Muhl-Zurbes P, Drassner C, Duthorn A, Kummer M, Hasenberg M,  
871 Voortmann S, Jastrow H, Dorrie J, Schaft N, Kraner M, Döhner K, Sodeik B, Steinkasserer A, &  
872 Heilingloh CS (2019) Autophagic degradation of lamins facilitates the nuclear egress of herpes  
873 simplex virus type 1. *J Cell Biol* **218**: 508-523
- 874 Tyanova S, Temu T, & Cox J (2016) The MaxQuant computational platform for mass spectrometry-  
875 based shotgun proteomics. *Nat Protoc* **11**: 2301-2319

- 876 Tyanova S, Temu T, Sinitcyn P, Carlson A, Hein MY, Geiger T, Mann M, & Cox J (2016) The Perseus  
877 computational platform for comprehensive analysis of (prote)omics data. *Nat Methods* **13**: 731-  
878 740
- 879 Vasudevan AAJ, Bahr A, Grothmann R, Singer A, Haussinger D, Zimmermann A, & Munk C (2018) MxB  
880 inhibits murine cytomegalovirus. *Virology* **522**: 158-167
- 881 Warner MS, Geraghty RJ, Martinez WM, Montgomery RI, Whitbeck JC, Xu R, Eisenberg RJ, Cohen GH,  
882 & Spear PG (1998) A cell surface protein with herpesvirus entry activity (HveB) confers  
883 susceptibility to infection by mutants of herpes simplex virus type 1, herpes simplex virus type 2,  
884 and pseudorabies virus. *Virology* **246**: 179-189
- 885 Whitley R & Johnston C (2021) Herpes Simplex Viruses: Pathogenesis and Clinical Insights. In *Fields*  
886 *Virology: DNA Viruses*, Howley PM, Knipe DM, Cohen JL, Damania BA (eds) pp 297-323. Wolters  
887 Kluwer Health/Lippincott Williams & Wilkins; 7th edition (May 17, 2021)
- 888 Whitley R & Roizman B (2016) Herpes Simplex Viruses. In *Clinical Virology, Fourth Edition*, Richman  
889 DD, Whitley RJ, Hayden FJ (eds) pp 415-445. ASM Press
- 890 Wolfstein A, Nagel CH, Radtke K, Döhner K, Allan VJ, & Sodeik B (2006) The inner tegument promotes  
891 herpes simplex virus capsid motility along microtubules in vitro. *Traffic* **7**: 227-237
- 892 Xie L, Ju Z, Zhong C, Wu Y, Zan Y, Hou W, & Feng Y (2021) GTPase Activity of MxB Contributes to Its  
893 Nuclear Location, Interaction with Nucleoporins and Anti-HIV-1 Activity. *Viol Sin* **36**: 85-94
- 894 Zenner HL, Yoshimura S, Barr FA, & Crump CM (2011) Analysis of Rab GTPase-activating proteins  
895 indicates that Rab1a/b and Rab43 are important for herpes simplex virus 1 secondary  
896 envelopment. *J Virol* **85**: 8012-8021
- 897 Zhang Y & McKnight JL (1993) Herpes simplex virus type 1 UL46 and UL47 deletion mutants lack VP11  
898 and VP12 or VP13 and VP14, respectively, and exhibit altered viral thymidine kinase expression. *J*  
899 *Virol* **67**: 1482-1492
- 900 Zhang Z, Kim T, Bao M, Facchinetti V, Jung SY, Ghaffari AA, Qin J, Cheng G, & Liu YJ (2011) DDX1,  
901 DDX21, and DHX36 helicases form a complex with the adaptor molecule TRIF to sense dsRNA in  
902 dendritic cells. *Immunity* **34**: 866-878
- 903

## 904 TABLE LEGENDS

905 **Supplementary Table S1: Host proteins in THP-1 cytosols.** Intensity-Based Absolute Quantitation  
906 (iBAQ) counts of the host proteins identified in the proteomic analysis of the cytosolic extracts  
907 prepared from rested or IFN-induced THP-1  $\phi$  cytosol. Statistical analyses were performed with a  
908 Welch's t-test. The following cut-offs were set for differentially-expressed proteins: permutation-  
909 based false-discovery rate  $\leq 0.05$  and  $|\log_2 \text{fold-change}| \geq 0.5$ . The protein groups were filtered to  
910 keep only the intensities measured in at least three out of four replicates per condition. Gene  
911 Ontology knowledge was used to reference the proteins previously described as induced by  
912 interferon.

913 **Supplementary Table S2: Host proteins in capsid-host protein complexes.** Intensity-Based  
914 Absolute Quantitation (iBAQ) counts of host proteins identified in the  $V_{0.1}$ ,  $V_{0.5}$ ,  $V_1$  and D capsid-host  
915 protein complexes assembled in rested or IFN-induced THP-1  $\phi$  cytosol. Statistical analyses were  
916 performed with a Welch's t-test. The following cut-offs were set for differentially expressed proteins:  
917 permutation-based false-discovery rate  $\leq 0.05$  and a  $|\log_2 \text{fold-change}| \geq 1.5$ . The protein groups  
918 were filtered to keep only those with intensities measured in at least three out of four replicates, in  
919 at least one condition. "Interaction significance" column indicates the proteins considered as specific  
920 interactors.

921 **Supplementary Table S3: Viral proteins in capsid-host protein complexes.** Intensity-based  
922 absolute quantification (iBAQ) counts of HSV-1(17<sup>+</sup>)Lox viral proteins from isolated  $V_{0.1}$ ,  $V_{0.5}$ ,  $V_1$  and D  
923 capsids (A) normalized to the intensity of the major capsid protein VP5, (B) unnormalized LFQ  
924 intensities. The viral proteins were filtered to keep only those with intensities measured in at least  
925 three out of four replicates, in at least one condition.

926 **Supplementary Table S4: List of Antibodies.** mAb: monoclonal antibody. pAb: polyclonal  
927 antibody.

928



929 **TABLE S4: LIST OF ANTIBODIES**

| Antigen               | Name                 | species, type | Source and Reference                                                                                               |
|-----------------------|----------------------|---------------|--------------------------------------------------------------------------------------------------------------------|
| <b>HSV-1 proteins</b> |                      |               |                                                                                                                    |
| capsid                | SY4563               | rabbit pAb    | (Döhner <i>et al.</i> , 2018)                                                                                      |
| VP5                   | NC-1                 | rabbit mAb    | Gary Cohen & Roselyn Eisenberg, University of Pennsylvania, Philadelphia, USA; (Cohen, G. H. <i>et al.</i> , 1980) |
| <b>Host proteins</b>  |                      |               |                                                                                                                    |
| nuclear pore          | mAb414               | mouse mAb     | ab24609, Abcam                                                                                                     |
| p230                  | p230                 | mouse mAb     | 611280, BD Biosciences                                                                                             |
| E-cadherin            | $\alpha$ -E-cadherin | mouse mAb     | C37020;610404, BD Transduction Laboratories                                                                        |
| calnexin              | $\alpha$ -calnexin   | rabbit pAb    | Ari Helenius, ETH Zürich, Switzerland; (Hammond & Helenius, 1994)                                                  |
| Tom20                 | F-10                 | mouse mAb     | Sc-17764, Santa Cruz Biotechnology                                                                                 |
| GAPDH                 | 14C10                | rabbit pAb    | 2118S, Cell Signaling (NEB)                                                                                        |
| MxA/MxB               | M143                 | mouse mAb     | (Flohr <i>et al.</i> , 1999)                                                                                       |
| MxA                   | $\alpha$ -Mx1        | rabbit pAb    | ab207414, Abcam                                                                                                    |
| MxB                   | $\alpha$ -Mx2        | rabbit pAb    | NBP1-81018, Novus Biological                                                                                       |
| FLAG                  | ANTI-FLAG            | rabbit pAb    | F7425, Sigma-Aldrich                                                                                               |

930

931 **FIGURES**

932

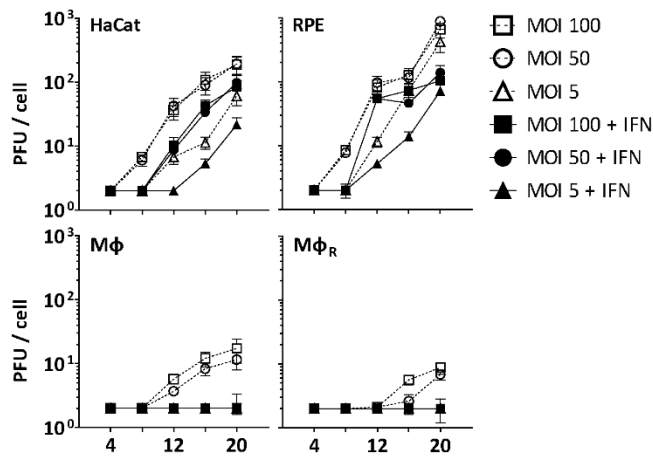

933

934 **Figure 1: IFN restricts HSV-1 infection in keratinocytes, epithelial cells, and macrophages.** HaCat,  
935 RPE, Mφ, or Mφ<sub>R</sub> cells were mock-treated or treated with human IFN-α (1000 U/mL) for 16 h and  
936 were infected with HSV-1(17<sup>+</sup>)Lox at  $2.5 \times 10^6$  (MOI 5),  $2.5 \times 10^7$  (MOI 50), or  $5 \times 10^7$  PFU/mL (MOI  
937 100), and the amount of cell-associated and extracellular virions was titrated on Vero cells. Each data  
938 point represents the mean of the three technical replicates of the combined cell-associated and  
939 extracellular titers. The error bars represent the standard deviation.

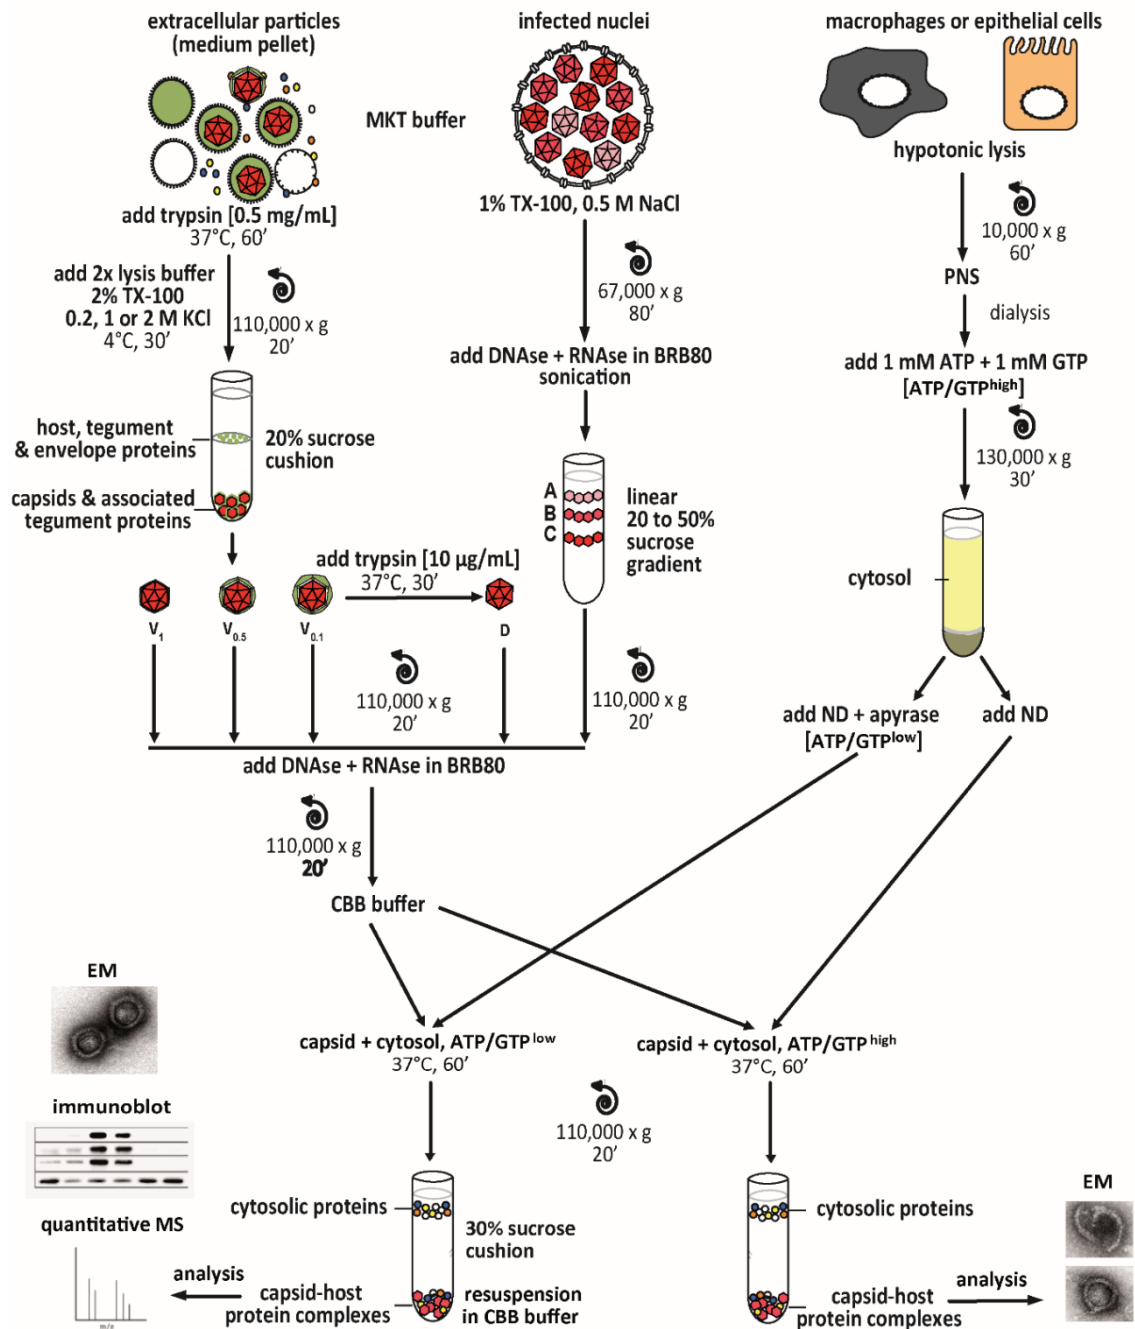

940

941 **Supplementary Figure S1: Experimental strategy to generate host protein-capsid complexes.**

942 Tegumented viral V<sub>0.1</sub>, V<sub>0.5</sub>, or V<sub>1</sub> capsids (red) were isolated from extracellular particles released from  
 943 BHK-21 cells infected with HSV-1(17<sup>+</sup>)Lox. They were lysed in 1% Triton X-100 to solubilize the viral envelope,  
 944 and to extract different amounts of tegument (green) in the presence of 0.1 M, 0.5 M or  
 945 1 M KCl. D capsids were generated from V<sub>0.1</sub> capsids by mild trypsin digestion. These different capsid  
 946 types were purified through sucrose cushions. Tegument-free nuclear A, B, and C capsids were  
 947 isolated from the nuclei of BHK cells infected with HSV-1(17<sup>+</sup>)Lox by gradient sedimentation. The  
 948 capsids were resuspended in BRB80 buffer, treated with benzonase to degrade DNA and RNA,  
 949 sedimented again, and incubated with cytosol fractions (yellow) from control or IFN-induced  
 950 macrophages (THP-1  $\phi$ ) or epithelial A549 cells. After sedimentation through sucrose cushions, the  
 951 capsid-host protein complexes were analysed by mass spectrometry (MS), immunoblot, or electron  
 952 microscopy (EM). PNS, post-nuclear-supernatant; ND, nocodazole.

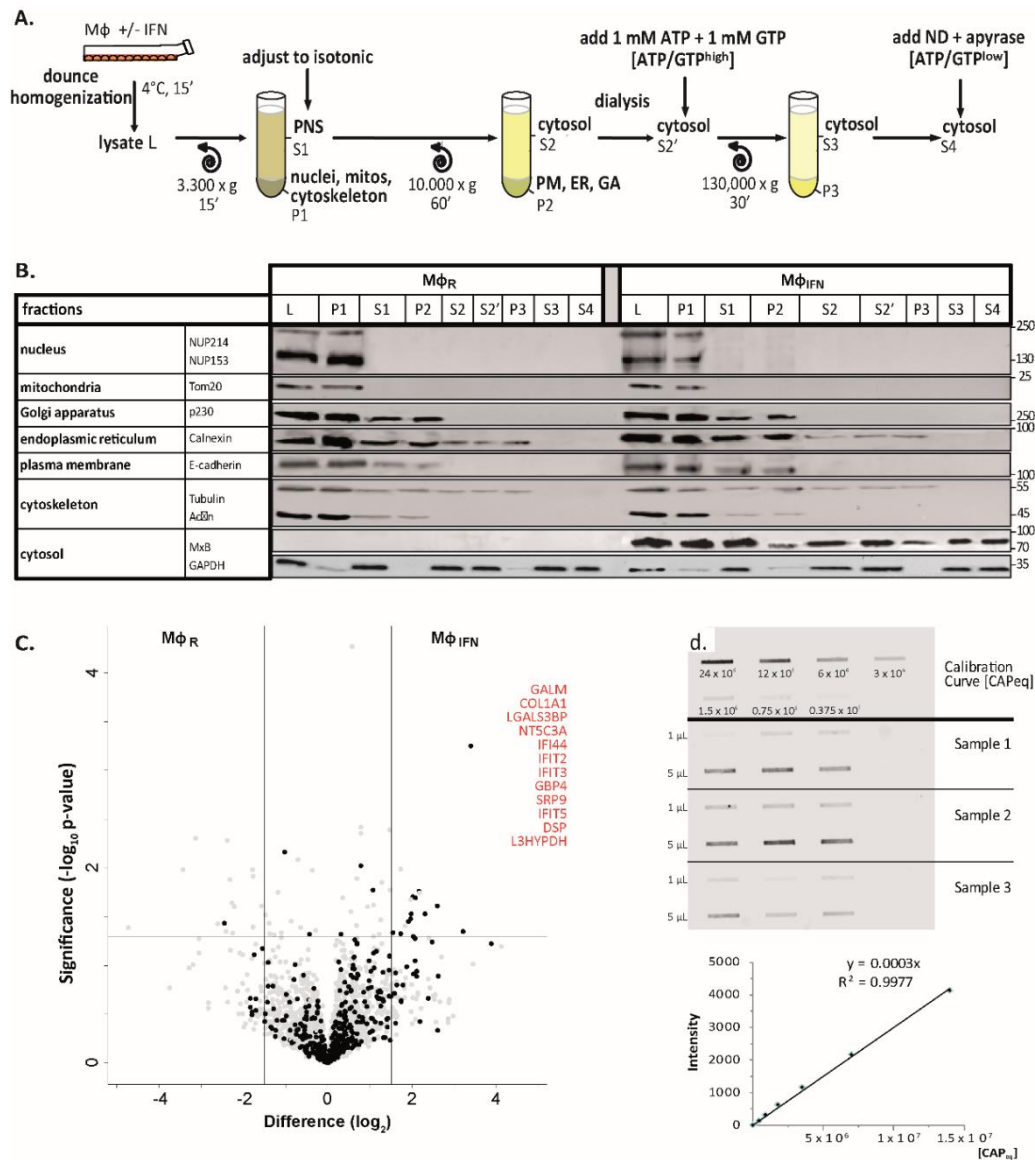

953

954 **Supplementary Figure S2: Characterization of cytosolic extracts and calibration of capsids.** (A)  
 955 Cytosols were prepared from rested Mφ<sub>R</sub> or IFN-induced Mφ<sub>IFN</sub> macrophage cells. After swelling in  
 956 hypotonic buffer, the cells were homogenized (L), and nuclei and mitochondria were sedimented  
 957 (P1). The post-nuclear supernatant (S1) was adjusted to isotonic salt concentration, and centrifuged  
 958 to sediment membrane compartments (P2), like the PM, ER and GA. To control the nucleotide  
 959 concentration, the cytosols (S2) were dialyzed against a 7 kDa membrane prior to the addition of an  
 960 ATP regeneration system (S2'). The remaining actin filaments and microtubules were sedimented in  
 961 P3 to obtain a soluble cytosol fraction (S3). To reduce ATP and GTP levels, some cytosols were  
 962 treated with 10 U/mL of apyrase (S4). Nocodazole (ND) was added to prevent polymerization and  
 963 sedimentation of microtubules. (B) All fractions generated were analysed by immunoblot for the  
 964 respective compartment marker proteins as indicated. Nup, nucleoporins. (C) Volcano plot  
 965 summarizing the effect of IFN induction on the cytosol proteome. ISGs associated with the  
 966 interferomeDB were enriched in cytosol from Mφ<sub>IFN</sub> as compared to Mφ<sub>R</sub> with an FDR of  $7.96 \times 10^{-7}$   
 967 and an FC  $\geq 2$  in at least 1 experiment (Fisher's exact test). IFN-inducible proteins are indicated by  
 968 black circles, and those with an abundance  $\log_2$  difference  $\geq 1.5$  (vertical lines), and an uncorrected p-  
 969 value  $< 0.05$  (horizontal line) are labelled in red. (D) The slot blot used for the estimation of capsid  
 970 concentrations (capsids equivalent; CAP<sub>eq</sub>) of all preparations was labeled with anti-capsid antibodies  
 971 (rabbit pAb SY4563) and adjusted to a calibration curve of a standard preparation.

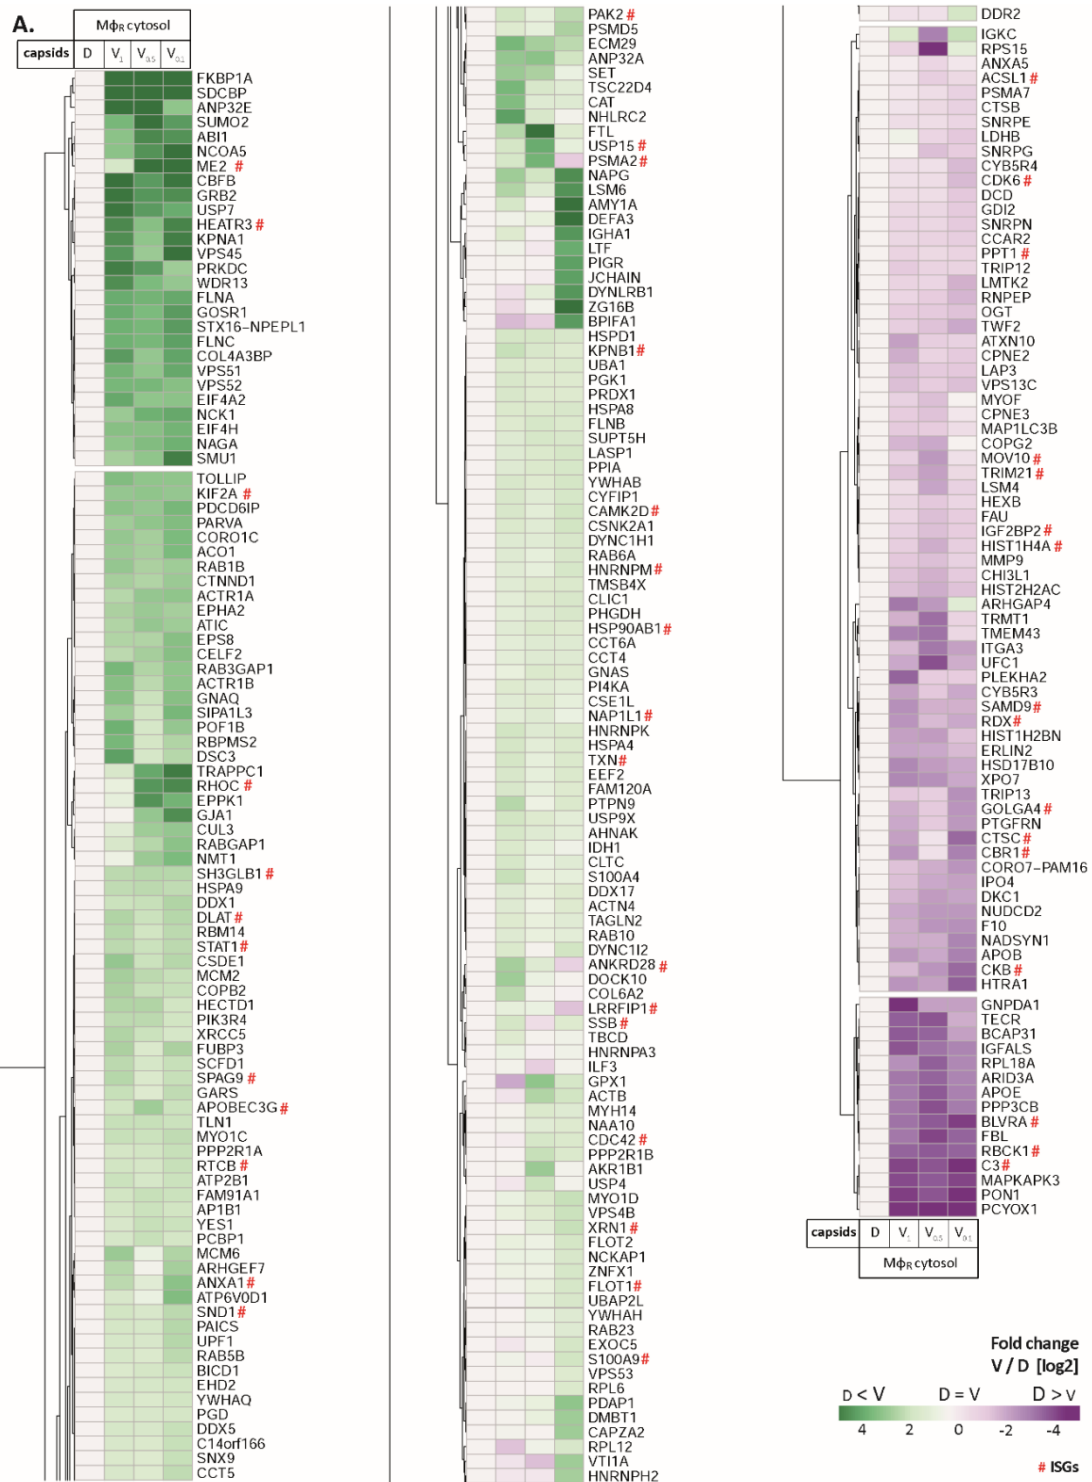

972

973 **Supplementary Figure S3A: HSV-1 capsids interactomes.** Unbiased hierarchical clustered heat map  
 974 showing the log<sub>2</sub> fold changes of host proteins identified from capsids-host protein sediments (c.f.  
 975 Fig. 2; abundance log<sub>2</sub> difference larger than 1; significance permutation-based FDR smaller than  
 976 0.05) from (A) cytosol of resting Mφ, or (B) IFN-induced Mφ<sub>IFN</sub> macrophages. For each protein, the  
 977 fold change was calculated based on their abundance (iBAQs) in V<sub>1</sub>, V<sub>0.5</sub>, or V<sub>0.1</sub> capsids compared to  
 978 D capsids using a linear scale from violet being the lowest to dark green being the highest.

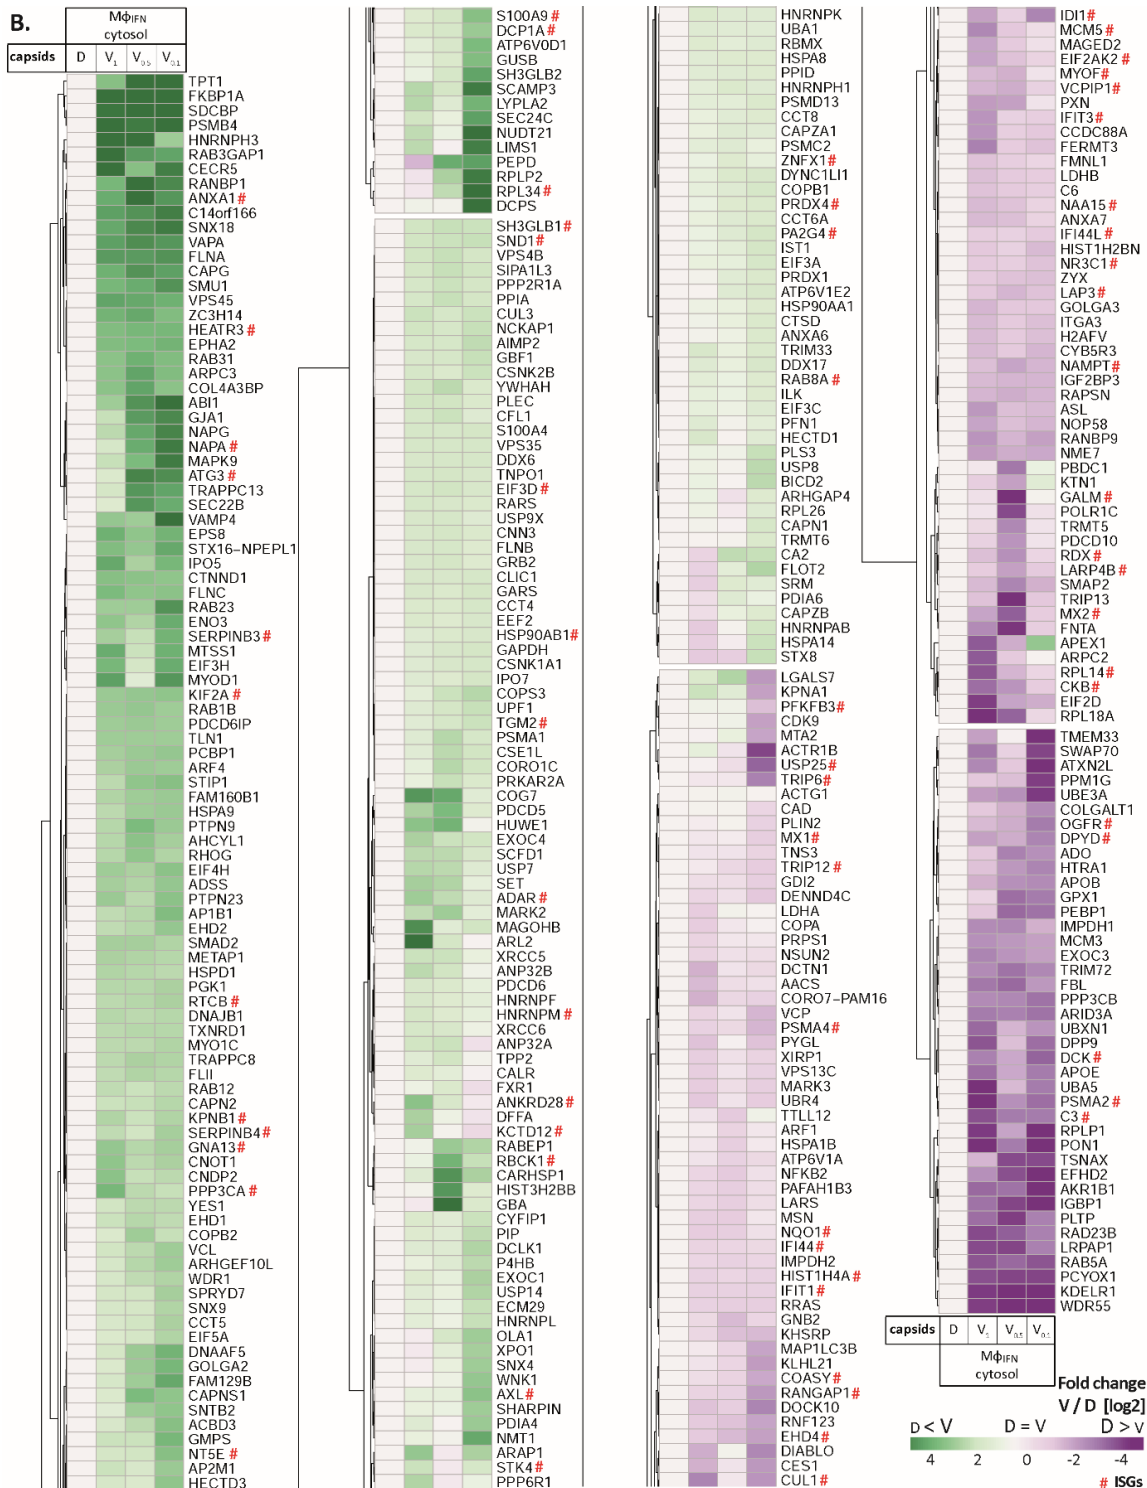

979

980

981

982

983

984

985

986

987

**Supplementary Figure S3B: HSV-1 capsids interactomes.** Unbiased hierarchical clustered heat map showing the log<sub>2</sub> fold changes of host proteins identified from capsids-host protein sediments (c.f. Fig. 2; abundance log<sub>2</sub> difference larger than 1; significance permutation-based FDR smaller than 0.05) from (A) cytosol of resting macrophages (M $\phi$ ), or (B) IFN-induced macrophages (M $\phi$ IFN). For each protein, the fold change was calculated based on their abundance (iBAQs) in V<sub>1</sub>, V<sub>0.5</sub>, or V<sub>0.1</sub> capsids compared to D capsids using a linear scale from violet being the lowest to dark green being the highest.

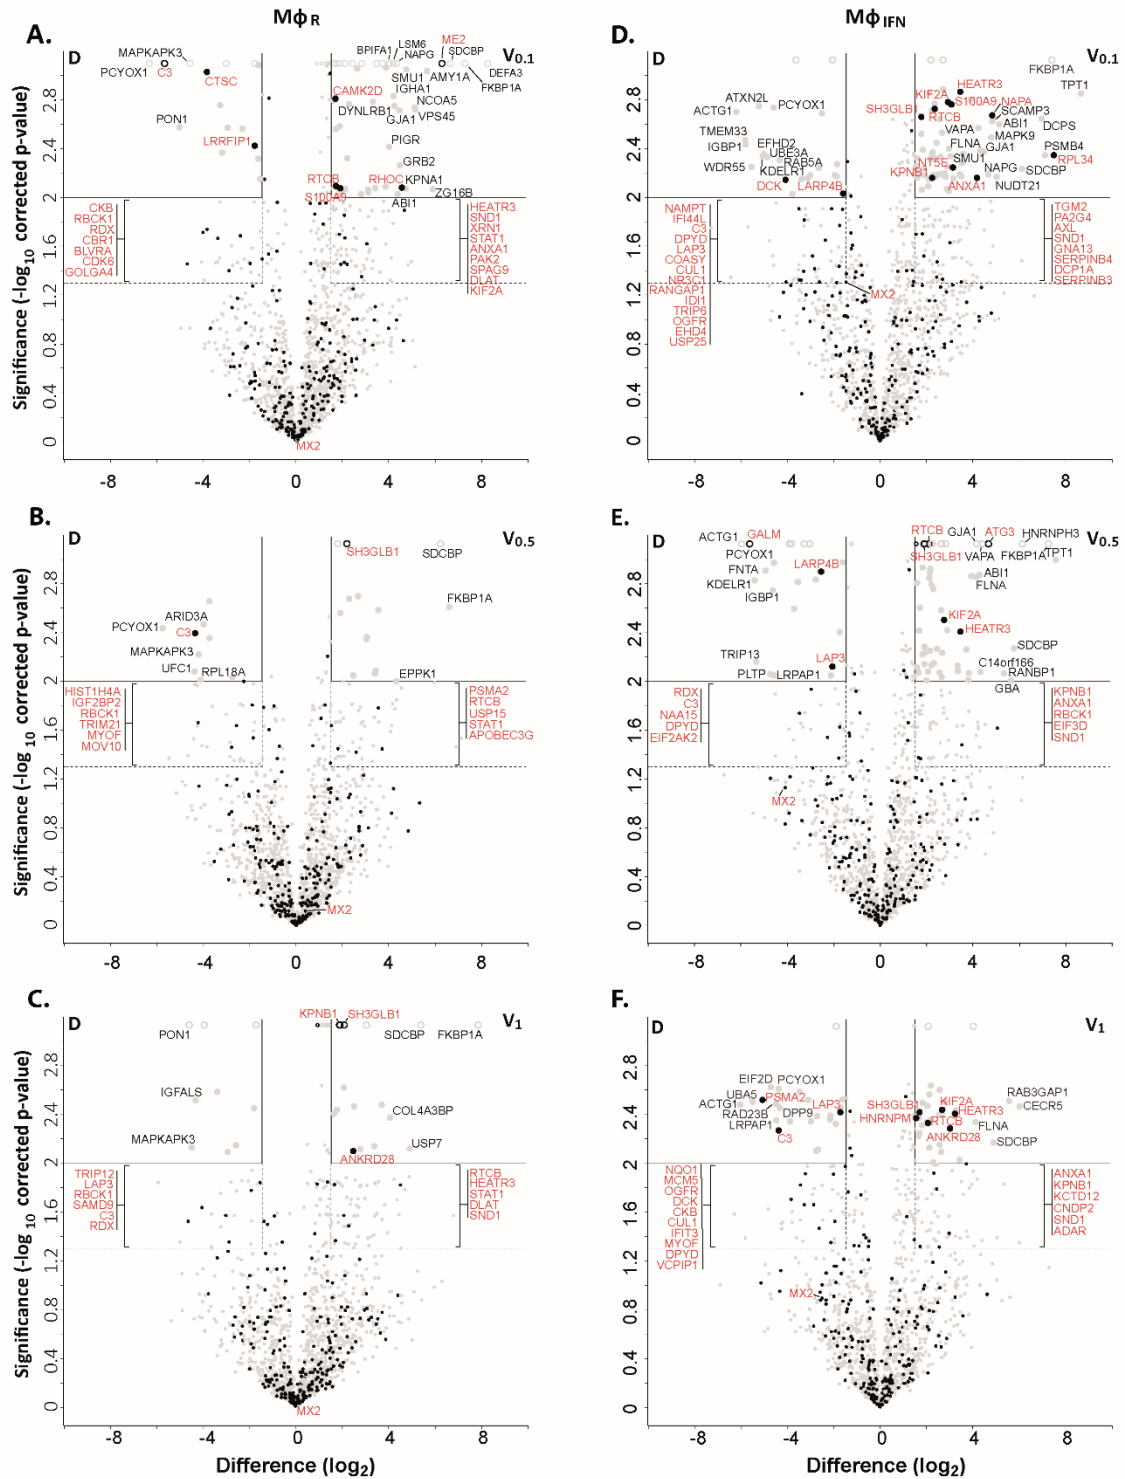

988

989 **Figure 2: Cytosolic IFN-induced macrophage proteins binding to HSV-1 capsids.** Volcano plots of  
 990 iBAQs counts of proteins identified in capsid-host protein complexes assembled in cytosol from  
 991 resting THP-1  $\phi$  cells (A - C) or treated with interferon- $\alpha$  (D - F) using V<sub>0.1</sub> (A, D), V<sub>0.5</sub> (B, E), or V<sub>1</sub> (C, F)  
 992 capsids in comparison to D capsids. Proteins identified as highly specific interactions are indicated  
 993 with larger symbols ( $\log_2$  difference: 1.5; Welch's t-test, two-tailed, permutation-based FDR  $\leq$  0.01);  
 994 those with a  $\log_2$  difference  $\geq$  4 are annotated. ISGs (interferome.org) are indicated by filled black  
 995 circles, and are annotated in red if significantly enriched (permutation-based FDR  $\leq$  0.05, and  $\log_2$   
 996 difference  $\geq$  1.5). Proteins with a q-value = 0 were imputed to  $-\log_{10}$  q-value = 3.1 (maximum of the  
 997 graph), and were indicated with empty circles.

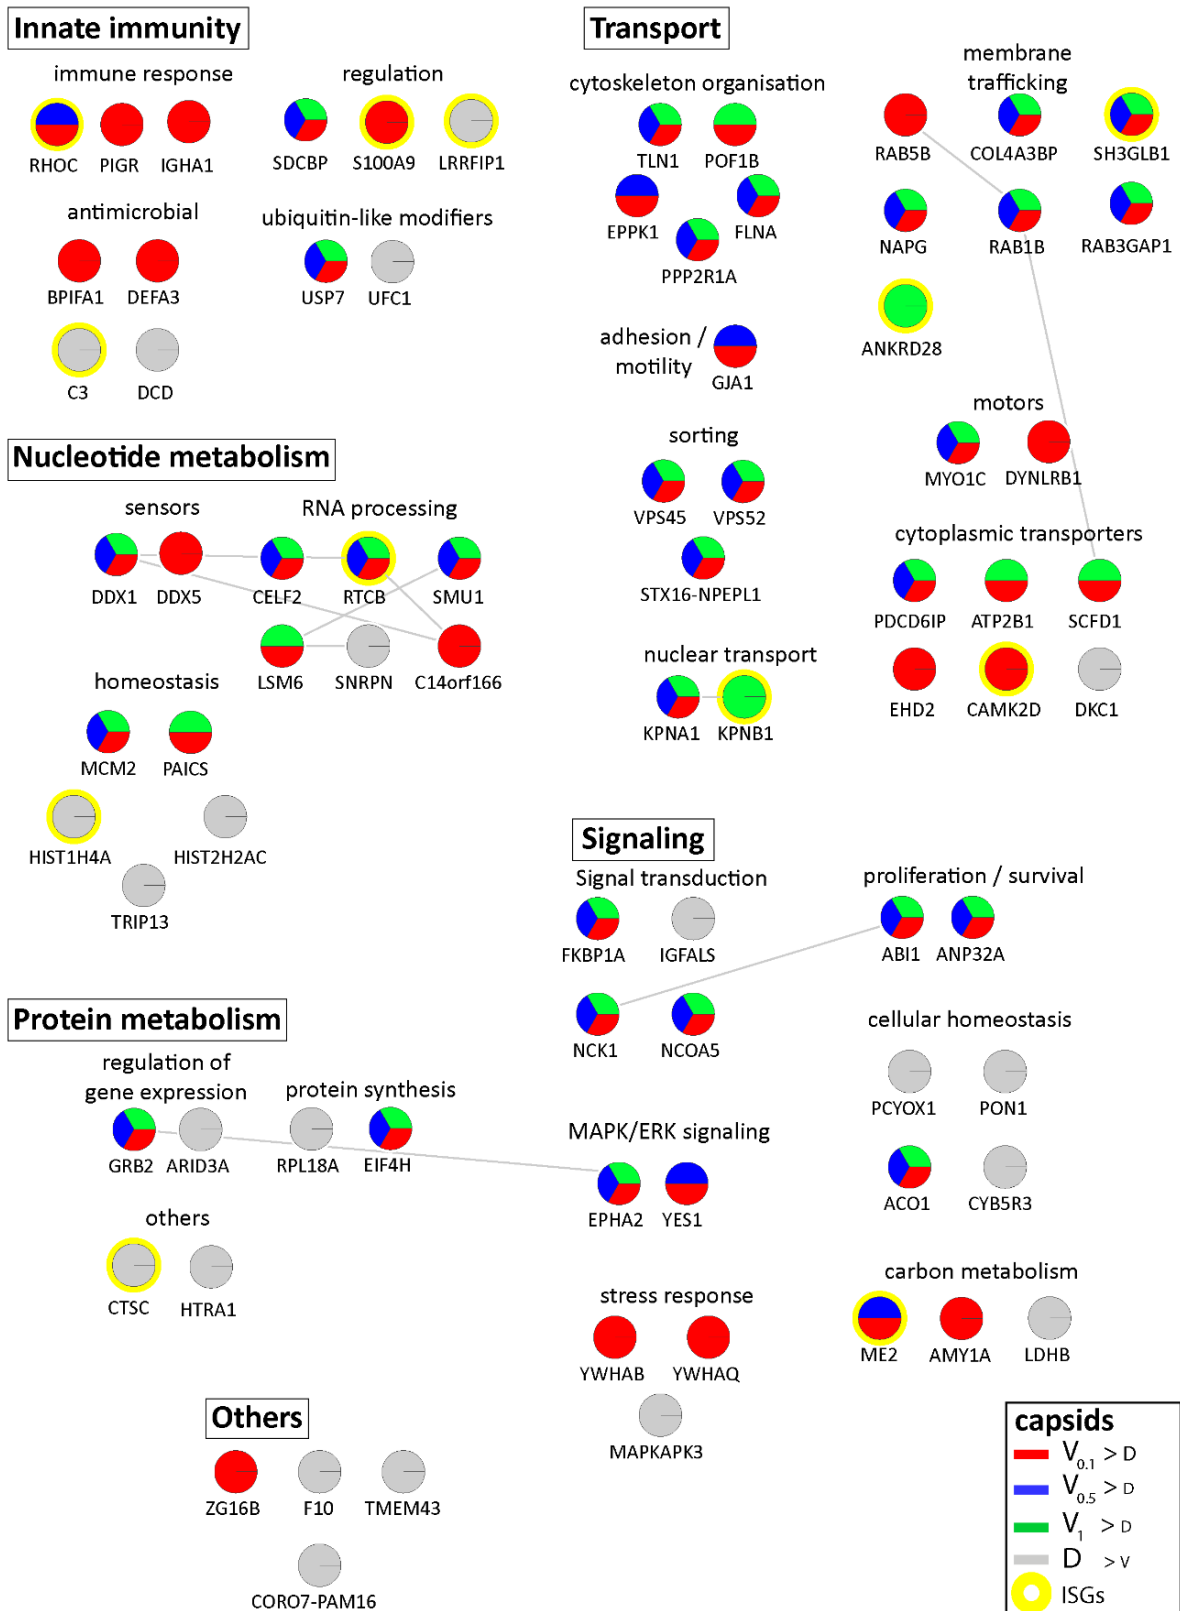

998

999 **Supplementary Figure S4: Cytosolic proteins of resting macrophage binding to HSV-1 capsids.** Host  
 1000 proteins from cytosol of resting M $\phi$  (c.f. Fig. 3A, 3B, 3C; abundance log<sub>2</sub> difference larger than 1.5;  
 1001 significance permutation-based FDR smaller than 0.05) interacting with V<sub>0.1</sub>, V<sub>0.5</sub>, V<sub>1</sub>, or D capsids  
 1002 were assembled into a functional interaction network of known protein-protein-interactions (grey  
 1003 lines; STRING database, confidence score of 0.7), and grouped according to their known functions  
 1004 (Gene Ontology, Pathway analysis). The Pie chart for each protein indicates its relative enrichment on  
 1005 V<sub>0.1</sub> (red), V<sub>0.5</sub> (blue), V<sub>1</sub> (green), or D capsids (grey).



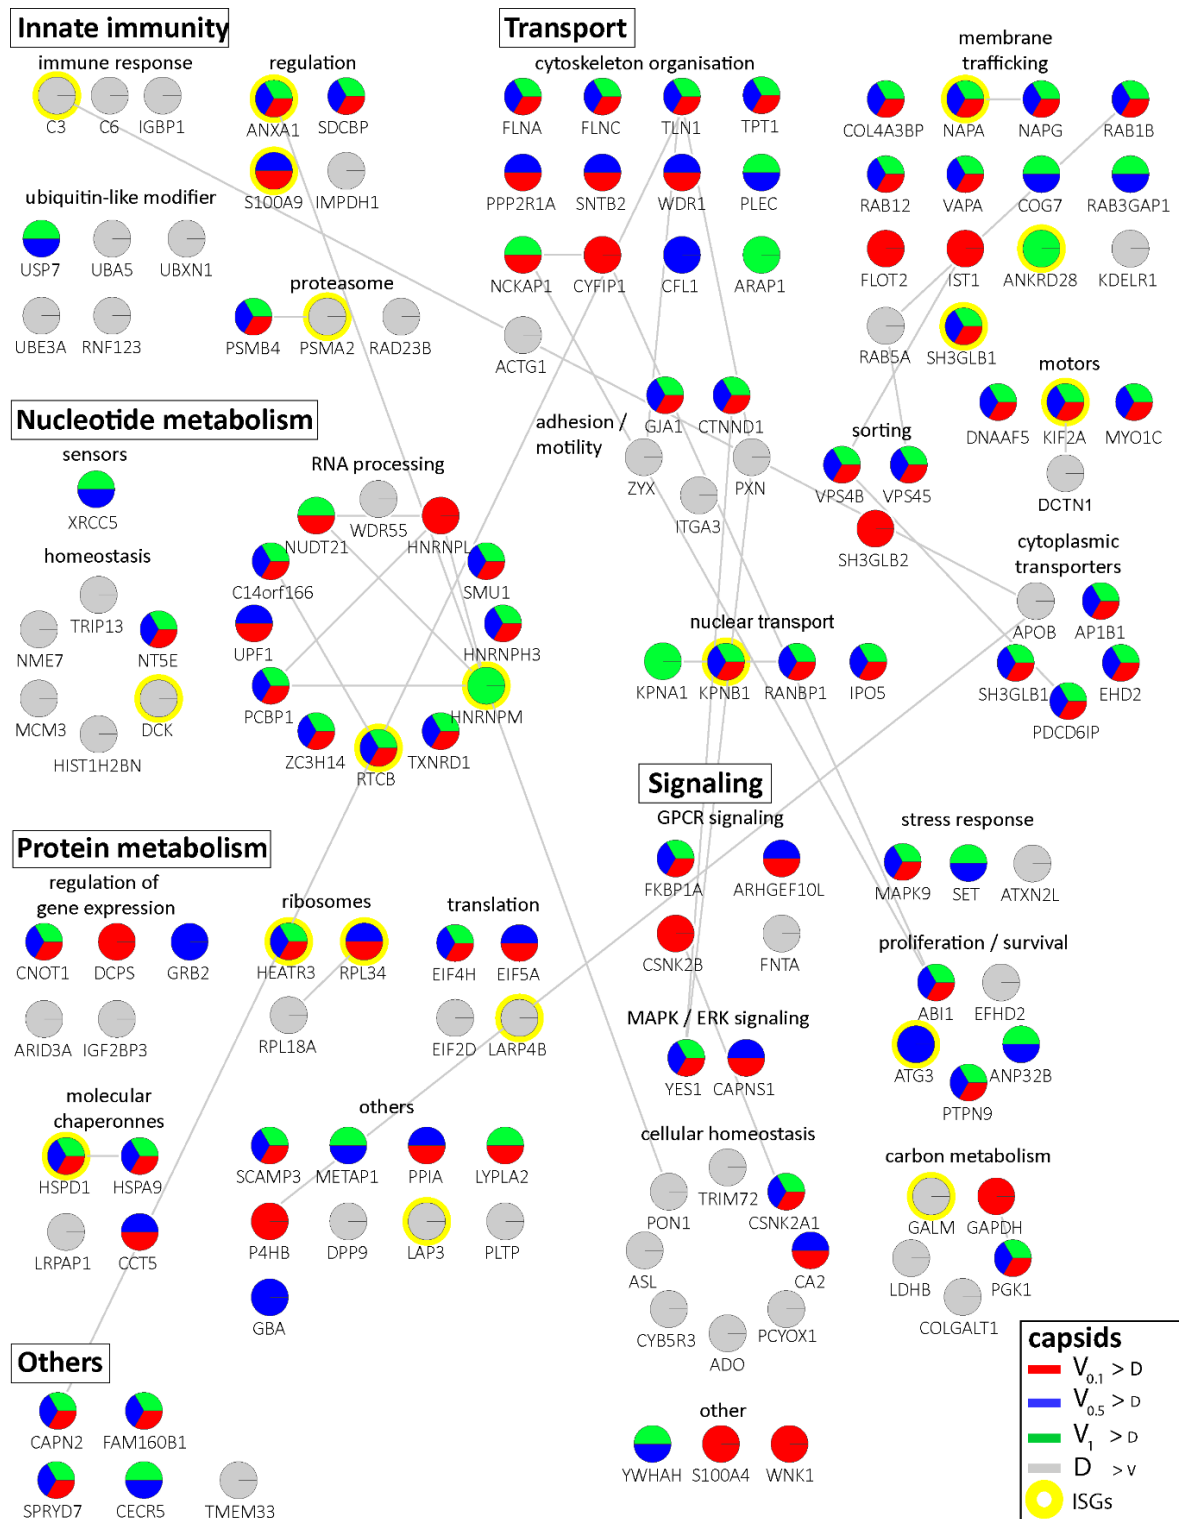

1006 **Figure 3: Cytosolic proteins of IFN-induced macrophages binding to HSV-1 capsids.** Host proteins  
 1007 from cytosol of IFN-stimulated  $M\phi_{IFN}$  (c.f. Fig. 3D, 3E, 3F; abundance  $\log_2$  difference larger than 1.5;  
 1008 significance permutation-based FDR smaller than 0.05) interacting with  $V_{0.1}$ ,  $V_{0.5}$ ,  $V_1$ , or D capsids  
 1009 were assembled into a functional interaction network of known protein-protein-interactions (grey  
 1010 lines; STRING database, confidence score of 0.7), and grouped according to their known functions  
 1011 (Gene Ontology, Pathway analysis). The Pie chart for each protein indicates its relative enrichment on  
 1012  $V_{0.1}$  (red),  $V_{0.5}$  (blue),  $V_1$  (green), or D capsids (grey).

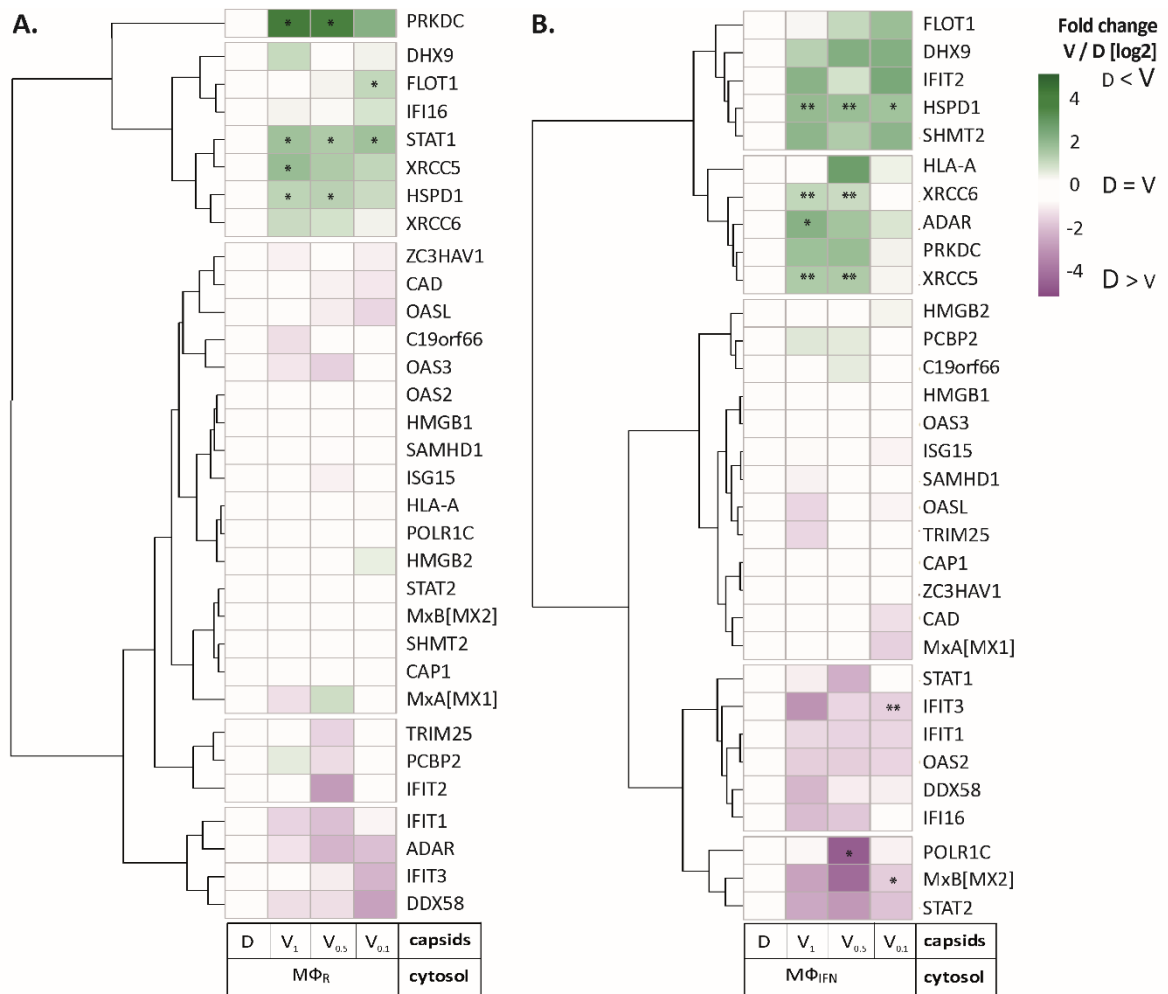

1013

1014 **Figure 4: HSV-1 capsids associate with proteins involved in type I IFN response.** Unbiased  
 1015 hierarchical clustered heat map showing the log<sub>2</sub> fold changes of IFN-induced proteins (GO type-I  
 1016 IFN) identified from capsids-host protein sediments from cytosol of resting M $\Phi$ , or IFN-induced M $\Phi$ <sub>IFN</sub>  
 1017 macrophages. For each protein, the fold change was calculated based on their abundance (iBAQs) in  
 1018 V<sub>1</sub>, V<sub>0.5</sub> and V<sub>0.1</sub> capsids as compared to their abundance in D capsids, using a linear scale from violet  
 1019 being the lowest to dark green being the highest. (\*) and (\*\*) design the proteins with an FDR  
 1020 corrected p-value < 0.05 and < 0.01, respectively.

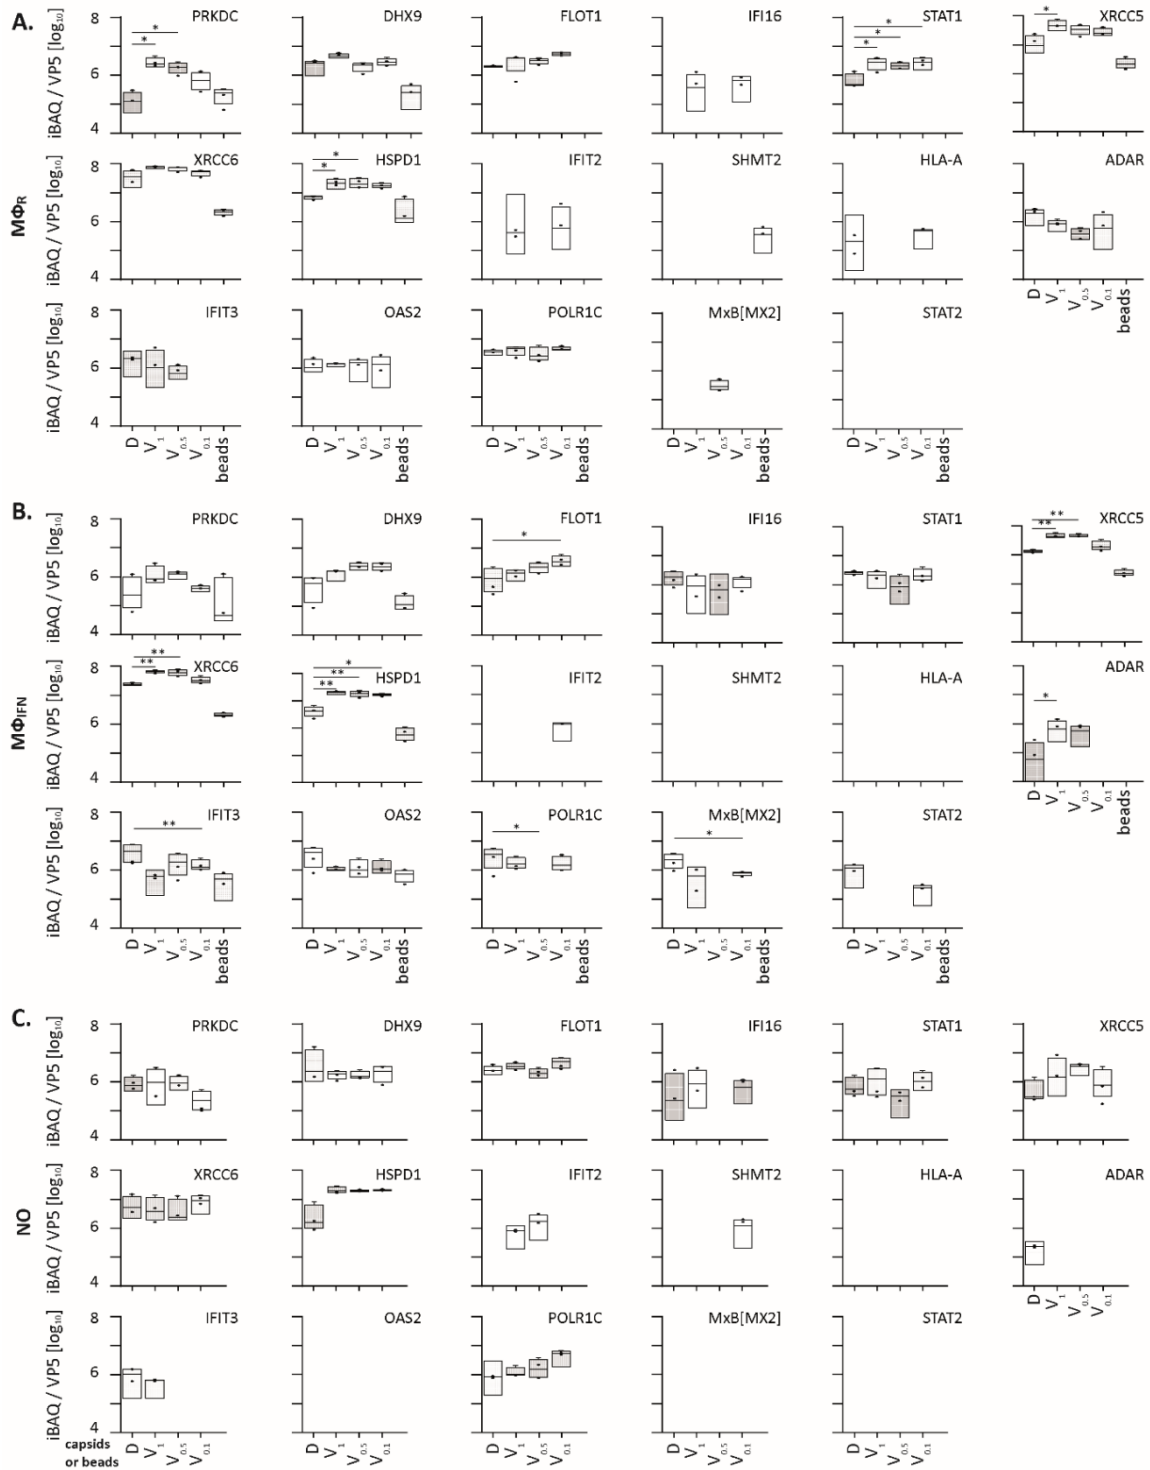

1021

1022 **Supplementary Figure S5: HSV-1 capsids binds to a few ISG proteins.** Box and whisker plot of iBAQs  
 1023 showing the differential detection of PRKDC, DHX9, FLOT1, IFI16, STAT1, XRCC5, XRCC6, HSPD1, IFIT2,  
 1024 SHMT2, HLA-A, ADAR, IFIT3, OAS2, POLR1C and Mx2 in D, V<sub>1</sub>, V<sub>0.5</sub> and V<sub>0.1</sub> capsids-host protein  
 1025 sediments after incubation in (A) cytosol of resting MΦR macrophages, (B) IFN-induced MΦIFN  
 1026 macrophages or (C) no cytosol. (\*) design the significant binding to D or V<sub>0.1</sub>, V<sub>0.5</sub> and V<sub>1</sub> capsids as  
 1027 assessed by Welch's t-test (two-tailed, permutation-based FDR ≤ 0.05) comparing D vs V<sub>0.1</sub>, V<sub>0.5</sub> or  
 1028 V<sub>1</sub> capsids in each cytosol separately.

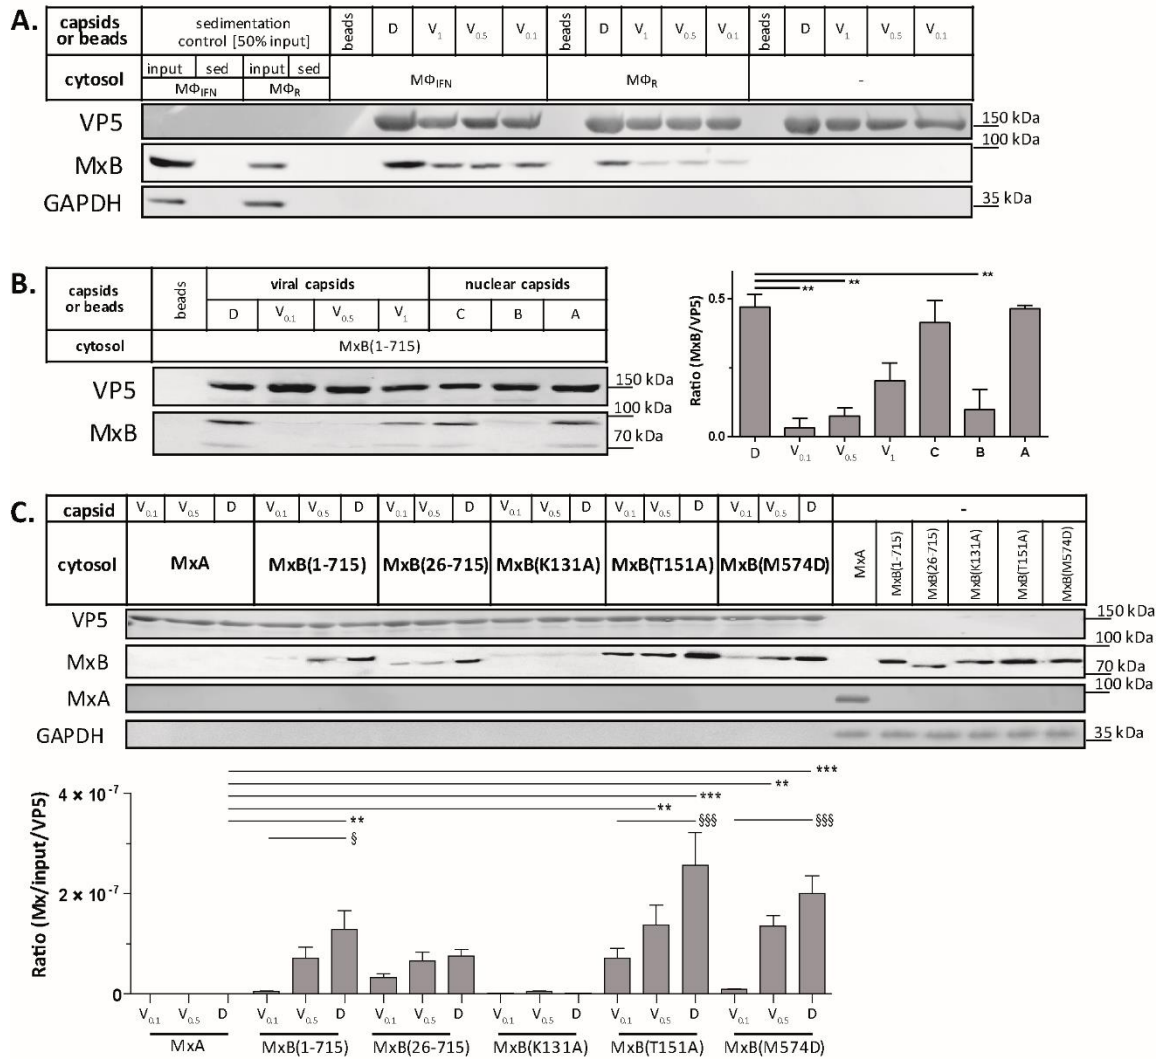

1029

1030 **Figure 5: Tegumentation reduces MxB binding to HSV-1 capsids.** The binding of MxB to viral V<sub>0.1</sub>,  
 1031 V<sub>0.5</sub>, V<sub>1</sub> or D, or to nuclear A, B or C capsids was analysed after incubation in 0.2 mg/mL cytosol  
 1032 prepared from (A) THP-1  $\phi$  stimulated or not with IFN, or (B-C) A549 cells stably expressing MxA,  
 1033 MxB(1-715) full length, the short MxB(26-715), or MxB mutants defective in GTP-hydrolysis  
 1034 MxB(T151A), GTP-binding and hydrolysis MxB(K131A), or dimerization MxB(M574D). Sedimented  
 1035 capsid-host protein complexes were then analysed by immunoblot for VP5 (capsid), MxB, MxA and  
 1036 GAPDH as a loading control. As control cytosols were sedimented without capsids (A: sed), or with  
 1037 uncoated agarose beads (A, B: beads). The amounts of MxA/MxB found in the capsid-host protein  
 1038 complexes were quantified, and normalized to their respective VP5 levels. Error bars: SEM.  
 1039 summarized from three experiments. One asterisk denotes p<0.05, two asterisks indicate p<0.01 and  
 1040 three asterisks represent p<0.001 as determined by Welch's t-tests comparisons.

1041

1042 **Figure 5A-source data 1-3. Figure 5B-source data 1-3. Figure 5C-source data 1-5.** Full western  
 1043 blot images for the corresponding detail sections shown in Figure 5, as well as raw values for western  
 1044 blot quantifications.

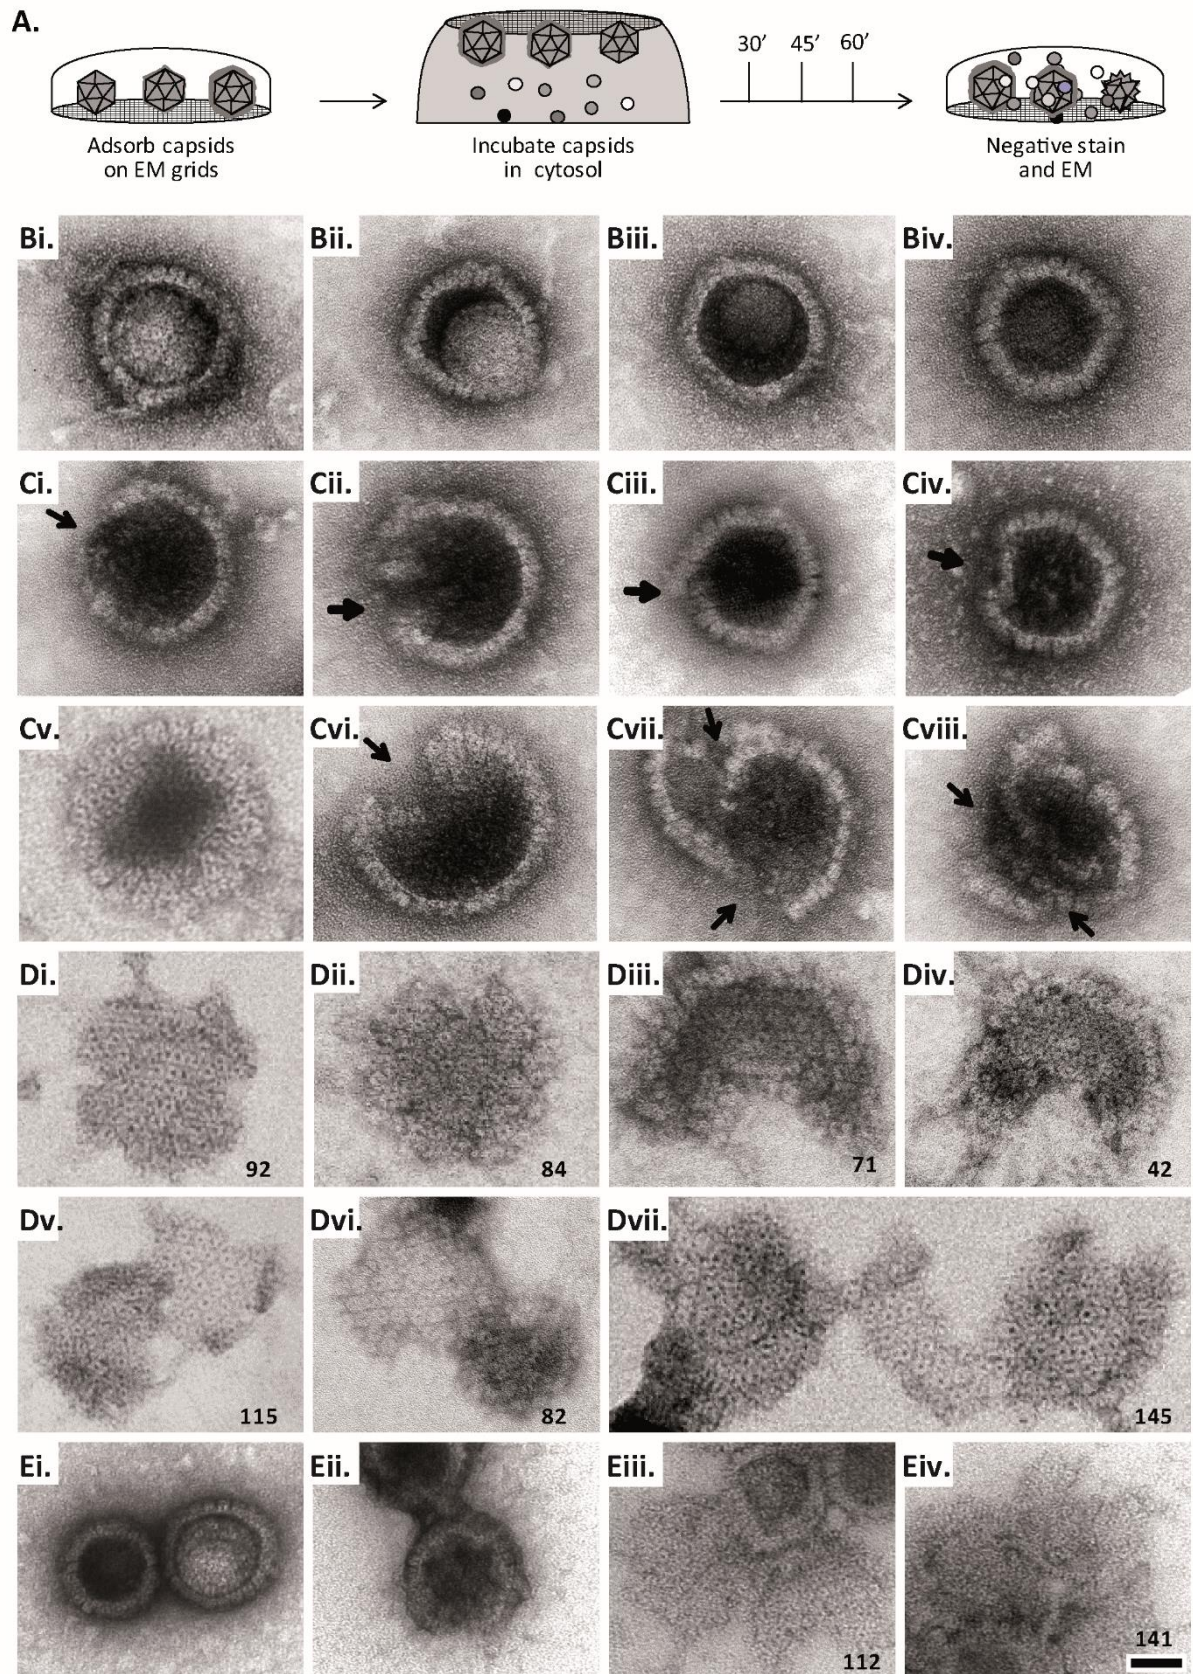

1045

1046 **Figure 6: MxB induces disassembly of herpesviral capsids.** (A) Experimental design: Capsids were  
 1047 adsorbed onto hydrophilic enhanced carbon-coated EM grids for 20 min at RT. The capsids were  
 1048 incubated in cytosol with ATP/GTP<sup>high</sup>, and the incubation was stopped at different times by  
 1049 extensive washing. The samples were analysed by EM after negative staining with uranyl acetate. (B-D) Capsids  
 1050 after incubation in cytosol derived from rested M $\phi$  or IFN-induced M $\phi$ <sub>IFN</sub> macrophages, or control or MxB(1-715)

1051 A549 expressing cells for 1 h at 37°C, and classified as (B) intact, (C) punched or (D) disassembled flat phenotypes.  
1052 The number of capsomers per flat particle was counted, and is displayed at the bottom of each figures. (E)  
1053 Nuclear VZV capsids remain intact (Ei) after incubation in the cytosol of A549 control cells, or but appear punched  
1054 (Eii) or as flat shells (Eiii, Eiv) after incubation in the cytosol of A549 cells expressing MxB. Scale bar: 50 nm.  
1055  
1056  
1057  
1058  
1059

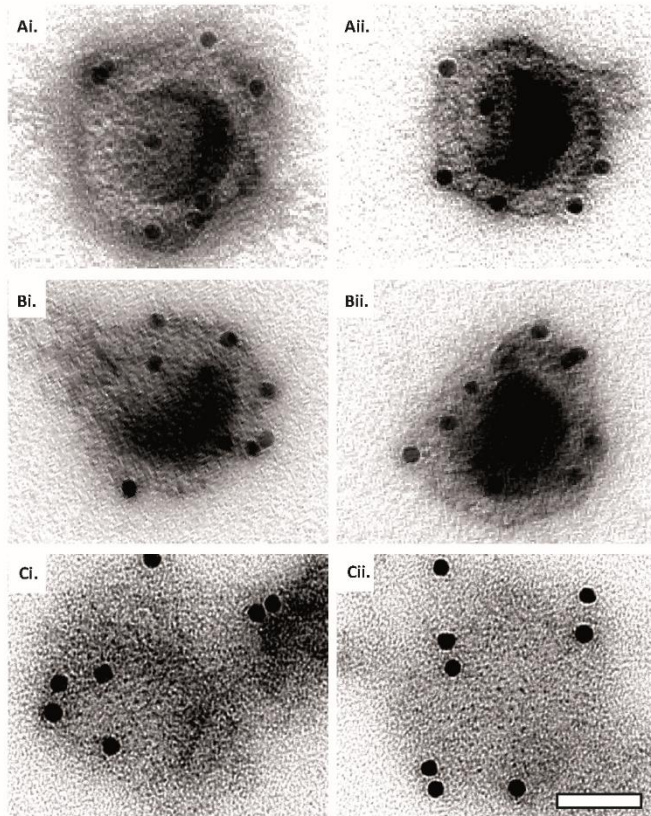

1060

1061 **Supplementary Figure S6: Capsid disassembly intermediates by anti-capsid immunoEM.** Images of capsids  
1062 after negative staining and labelling with antibodies raised against the major capsid protein VP5 (NC-1), after  
1063 incubation in ATP-complemented cytosol from A549 control or MxB(1-715) expressing cells for 60 min at 37°C,  
1064 and classified as (A) *intact*, (B) *punched*, or (C) *flattened shells*. Scale bar: 50 nm.

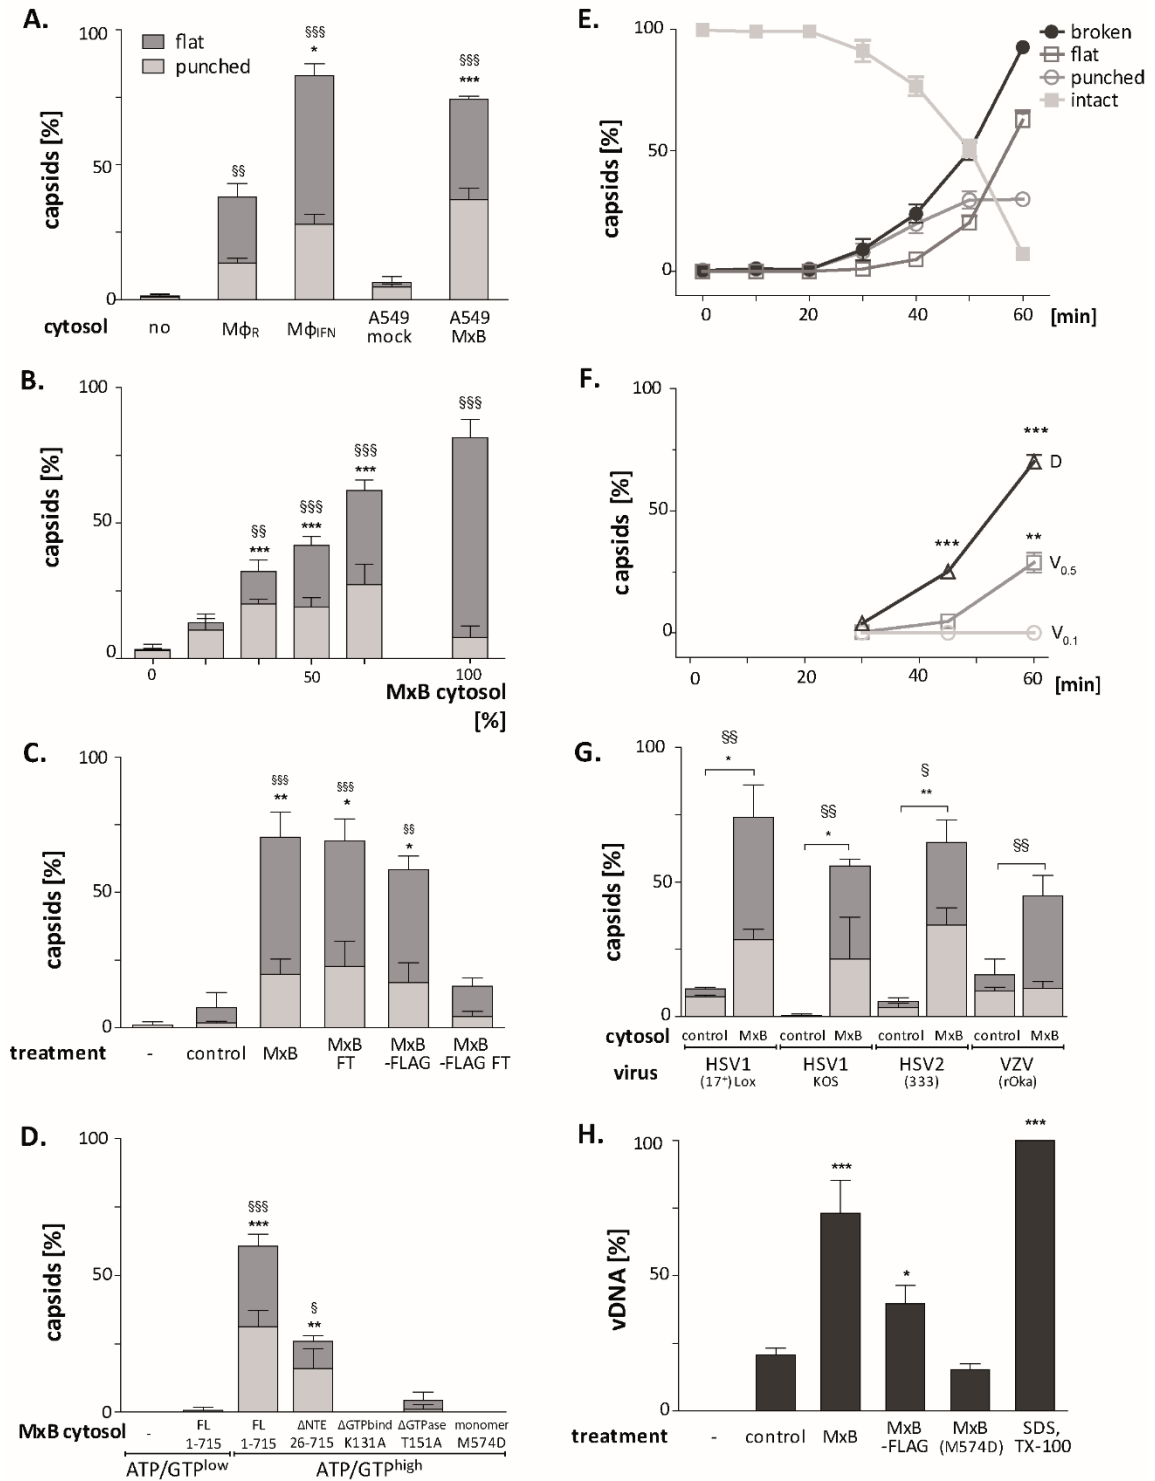

1065

1066 **Figure 7: MxB GTP hydrolysis and dimerization required for capsid disassembly and vDNA release**  
 1067 **of viral genomes.** HSV-1 (A-H), HSV-2 (G) or VZV capsids (G) were incubated with cytosol at  
 1068 ATP/GTP<sup>high</sup> for 1 h or the indicated time (E,F) at 37°C, and classified into *intact*, *punched* and *flat*  
 1069 capsids by electron microscopy (A-G), or the amount of released viral DNA was measured by qPCR  
 1070 (H). (A) Quantification of *punched* and *flat* D capsid shells in cytosol prepared from rested M $\phi$  or IFN-  
 1071 induced M $\phi$ <sub>IFN</sub> macrophages, or from control A549 (mock) or A549-MxB(1-715) cells. (B) Increasing  
 1072 amounts of MxB(1-715) [%] were added to control A549 cytosol, and the amount of *punched* and *flat*  
 1073 capsids were quantified after incubation in these mixtures. (C) Cytosols of A549 cells expressing  
 1074 MxB(1-715) and Mx(25-715) or MxB(1-715)-FLAG and MxB(26-715)-FLAG were incubated with anti-  
 1075 FLAG antibodies coupled to magnetic beads, the flow-through fractions (FT) were harvested, capsids  
 1076 were treated with anti-FLAG treated or control cytosols, and the amount of punched and flat capsids

1077 were quantified. (D) Capsids were incubated in cytosols prepared from A549 cells expressing full-  
1078 length (FL) MxB(1-715), MxB(26-715), MxB(K131A), MxB(T151A), or MxB(M574D) at ATP/GTP<sup>low</sup> or  
1079 ATP/GTP<sup>high</sup> levels. (E) Time-course of MxB-induced disassembly of capsids pre-adsorbed onto EM  
1080 grids, incubated with cytosol from A549-MxB(1-715). (F) Analysis of D, V<sub>0.5</sub>, or V<sub>0.1</sub> capsids treated  
1081 with MxB(1-175) cytosol for *broken (punched + flat)* capsids after negative stain and EM as described  
1082 for panel E. (G) Quantification of MxB cytosol disassembly of D capsids of HSV-1(17<sup>+</sup>)Lox, HSV-1(KOS),  
1083 or HSV-2(333), or nuclear C capsids of VZV, after incubation in cytosol from A549-MxB(1-715) cells.  
1084 (H) D capsids were incubated with different cytosols for 1 h at 37°C or treated with 1% SDS and 10%  
1085 Tx-100 only, and the released DNA not protected by capsid shells was quantified by qPCR. Error bars:  
1086 SEM from 100 capsids in 3 biological replicates. One symbol of \* or § denotes p<0.05, two p<0.01,  
1087 and three p<0.001 as determined in One-way analysis of variance with a Bonferroni post-test, and  
1088 comparing the relative amounts of (\*) *punched* and (§) *flat* capsids, or indicating the differences with  
1089 the mock treated samples (\*).  
1090

1091

1092

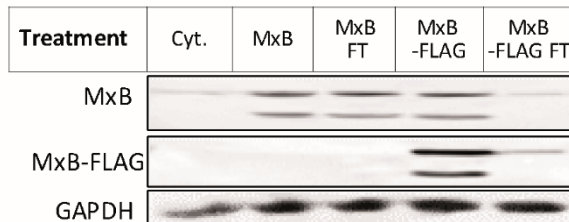

1093

1094 **Supplementary Figure S7: Cytosol immunodepleted for MxB.** Cytosols prepared from A549-MxB(1-  
1095 715) and MxB(26-715) expressing MxB(1-715) and MxB(26-715), or A549-MxB-FLAG cells expressing  
1096 MxB(1-715)-FLAG and MxB(26-715)-FLAG, respectively, were incubated with agarose beads coupled  
1097 to anti-FLAG antibodies. After immunodepletion with anti-FLAG beads to deplete MxB(1-715)-FLAG  
1098 and MxB(26-715)-FLAG, the flow through (FT) was harvested. To determine to what extent the FLAG-  
1099 tagged MxB proteins had been depleted, the starting cytosols (MxB, MxB-FLAG) as well as the  
1100 respective FT fractions were probed by immunoblot using antibodies directed against MxB, FLAG, or  
1101 GAPDH as a loading control.  
1102

1103 **Figure S7-source data 1,2.** Full western blot images for the corresponding detail sections shown in

1104 Figure S7.

1105



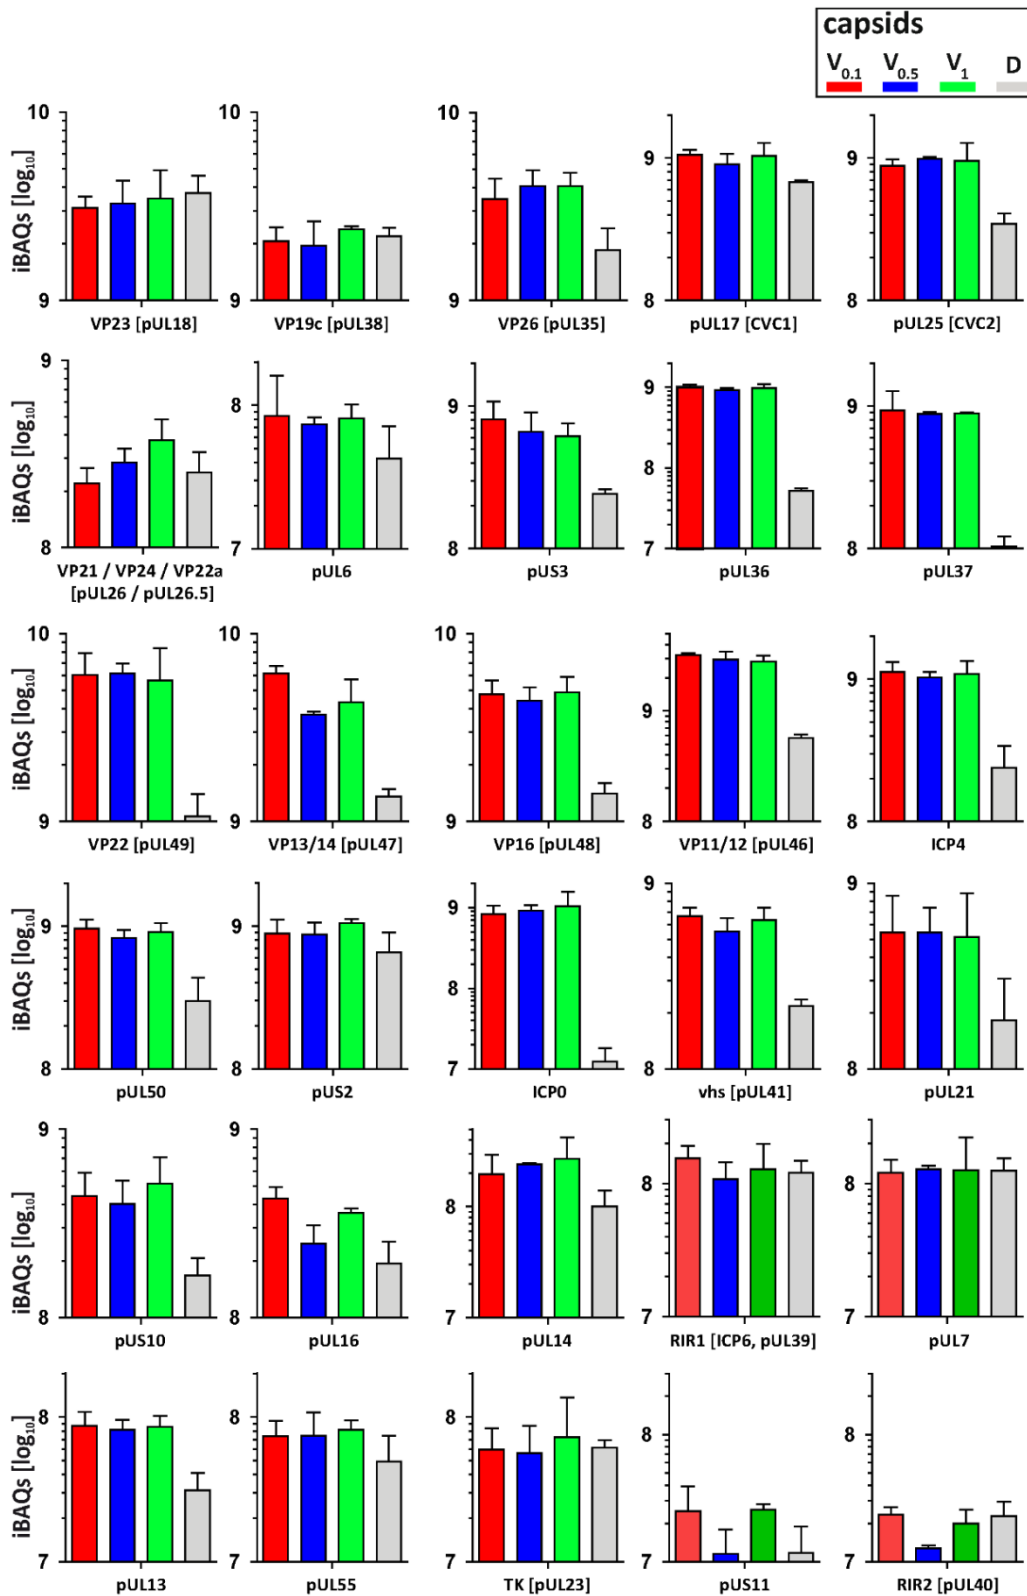

1106

1107 **Figure 8: Structural and tegument characterization of  $V_{0.1}$ ,  $V_{0.5}$ ,  $V_1$ , and D capsids.** The composition  
 1108 of HSV-1(17<sup>+</sup>)Lox derived  $V_{0.1}$  (red),  $V_{0.5}$  (blue),  $V_1$  (green) and D (grey) capsids was analysed by  
 1109 quantitative mass spectrometry in four biological replica. The sum of all the peptides intensities  
 1110 (iBAQ, intensity-based absolute quantification) of each viral protein known to participate in the  
 1111 structure of the capsids was normalized to the one of VP5 and displayed in a bar plot for each viral  
 1112 protein.

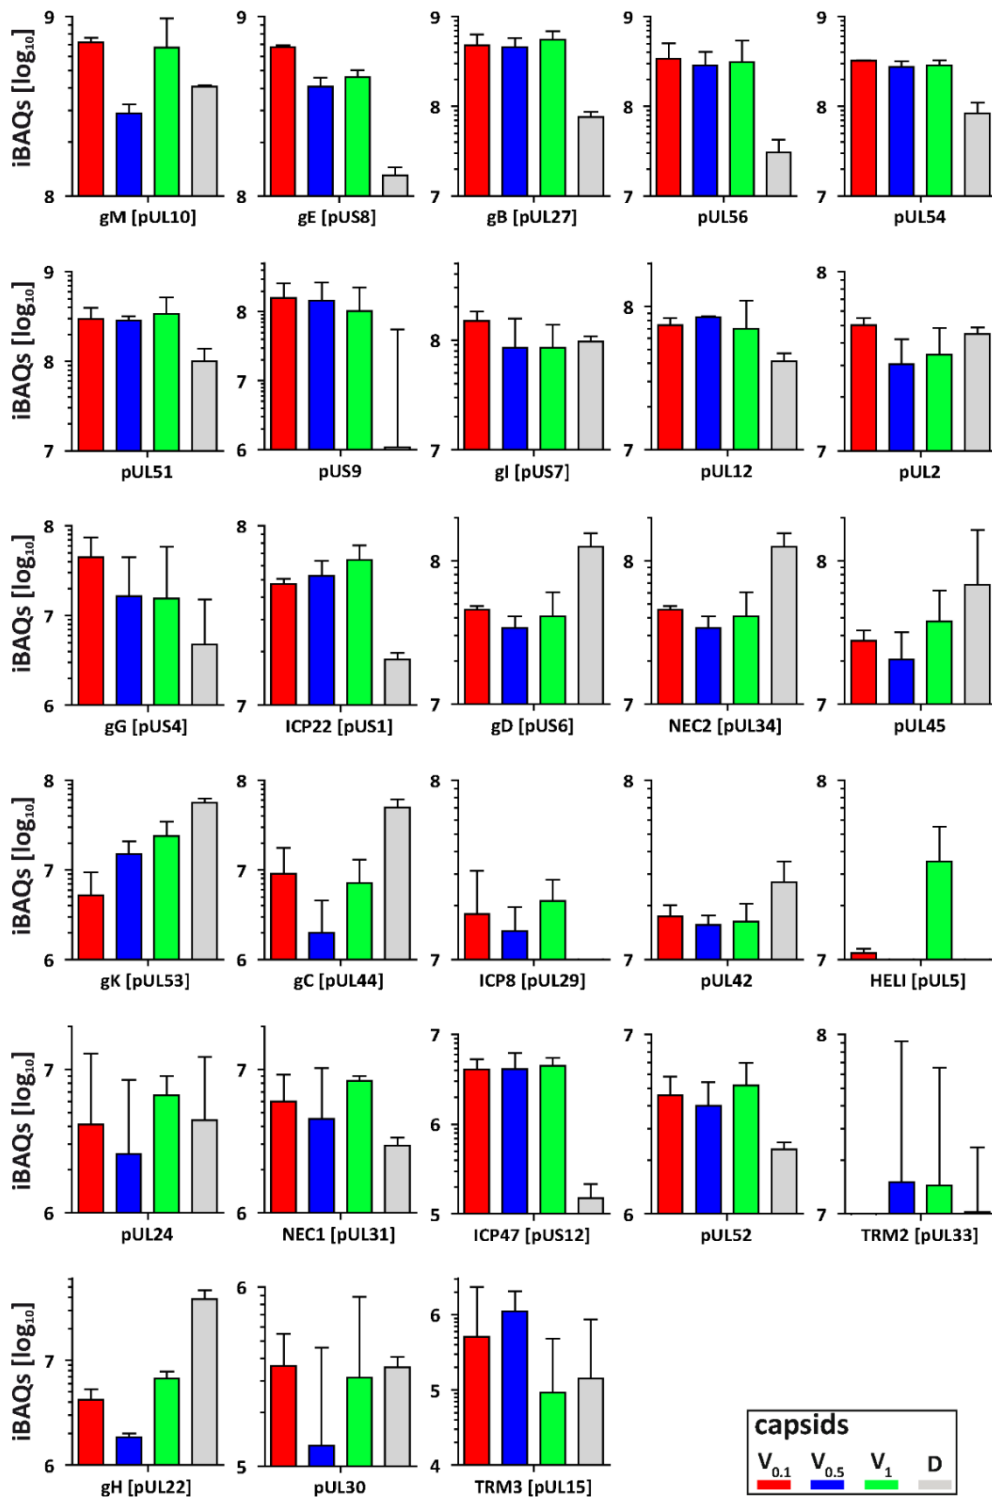

1113

1114 **Supplementary Figure S8: Membrane and non-structural proteins on V capsids versus D capsids.**

1115 The composition of HSV-1 derived V<sub>0.1</sub> (red), V<sub>0.5</sub> (blue), V<sub>1</sub> (green) and D (grey) capsids were analysed  
 1116 by quantitative mass spectrometry in four biological replicates. The sum of all the peptides  
 1117 intensities (iBAQ, intensity-based absolute quantification) of each viral protein unknown to  
 1118 participate in the structure of the capsids was normalized to the one of VP5 and displayed in a bar  
 1119 plot
